# Supplementary material for: Rvb1/Rvb2 proteins couple transcription and translation during glucose starvation
Source: eLife journal article supplement (doi:10.7554/elife.76965), 2022-09-14
Supplement: supp [file source_data_Fig2sup3_Rvb1.xls]

chr	start	end	length	summit	tags	#NAME?	fold_enrichment	FDR(%)
chrI	31815	35716	3902	2823	2399	1784.63	3.53	0.0000000
chrI	38662	39786	1125	587	475	78.51	2.92	0.1600000
chrI	47809	49163	1355	684	648	211.96	2.79	0.1200000
chrI	60519	61924	1406	809	725	255.37	2.9	0.0000000
chrI	62203	63457	1255	599	618	201.81	3.25	0.1200000
chrI	67421	73935	6515	677	4791	3100	4.07	0.0000000
chrI	75810	77043	1234	623	644	239.18	3.65	0.0000000
chrI	81701	84974	3274	2713	1396	233.24	2.34	0.0000000
chrI	86510	87873	1364	791	690	245.58	2.86	0.0000000
chrI	92195	93521	1327	706	596	148.85	2.72	0.1000000
chrI	112830	114070	1241	549	552	93.12	2.61	0.1700000
chrI	124201	125517	1317	655	706	292.61	3.51	0.0000000
chrI	128488	129831	1344	588	605	85.45	2.17	0.1600000
chrI	137835	142482	4648	1745	3650	3189.23	3.29	0.0000000
chrI	159885	166788	6904	5442	4402	563.82	2.99	0.0000000
chrI	174504	175814	1311	676	689	247.3	3.31	0.0000000
chrI	179479	181788	2310	1726	954	71.94	1.99	0.1500000
chrI	182002	185289	3288	797	1592	283.61	2.33	0.0000000
chrI	187540	189589	2050	1368	974	142.67	2.23	0.1000000
chrI	190824	193106	2283	1804	875	61.4	1.87	0.1400000
chrI	205520	206914	1395	930	573	97.76	3.21	0.1700000
chrII	2	1521	1520	653	850	71.81	1.84	0.1500000
chrII	1899	6256	4358	1900	3191	1057.55	3.18	0.0000000
chrII	17363	18577	1215	533	523	99.55	2.61	0.0900000
chrII	23231	24585	1355	578	690	273.42	3.17	0.0000000
chrII	27550	29361	1812	575	777	74.85	1.82	0.1500000
chrII	29495	32790	3296	1382	1609	146.79	2.12	0.1000000
chrII	35723	37159	1437	873	637	79.05	2.21	0.1600000
chrII	46115	47638	1524	996	671	80.23	1.97	0.1600000
chrII	48097	50145	2049	1463	1031	323.98	2.67	0.0000000
chrII	68856	70135	1280	704	673	270.51	3.31	0.0000000
chrII	80164	81334	1171	619	506	74.03	2.59	0.1500000
chrII	87307	88580	1274	656	517	59.2	1.94	0.1400000
chrII	95630	96744	1115	553	445	54.63	2.59	0.2000000
chrII	99675	101694	2020	1468	850	136.24	1.85	0.1000000
chrII	110853	112160	1308	607	668	260.31	3.3	0.0000000
chrII	112903	114381	1479	744	858	580.5	4.04	0.0000000
chrII	116383	117668	1286	610	570	125.2	2.48	0.1000000
chrII	124182	125699	1518	701	934	651.44	3.64	0.0000000
chrII	131586	132783	1198	586	529	116.07	2.78	0.0900000
chrII	135118	136910	1793	738	950	461.75	2.68	0.0000000
chrII	140043	141912	1870	1210	1168	954.32	3.46	0.0000000
chrII	142271	143596	1326	670	629	199.46	2.88	0.1200000
chrII	159368	160695	1328	739	575	97.33	2.32	0.1700000
chrII	163734	166044	2311	1136	1276	715.31	3.04	0.0000000
chrII	171979	173065	1087	573	448	65.24	2.76	0.1400000
chrII	191122	192774	1653	811	921	391.94	3.11	0.0000000
chrII	192853	194644	1792	976	990	390.13	3.26	0.0000000
chrII	201252	204117	2866	2081	1629	743.87	2.58	0.0000000
chrII	215602	217817	2216	749	1334	658.45	3.26	0.0000000
chrII	220588	224368	3781	1216	2211	783.77	2.78	0.0000000
chrII	226167	227793	1627	584	792	96.93	2.24	0.1700000
chrII	234857	239769	4913	1288	2790	1369.74	2.95	0.0000000
chrII	240995	243479	2485	1787	1243	395.68	3.03	0.0000000
chrII	245000	248114	3115	1787	1610	502.9	2.49	0.0000000
chrII	250486	252115	1630	1050	833	254.9	2.61	0.0000000
chrII	254610	257396	2787	1368	1762	1014.81	3.11	0.0000000
chrII	259403	262547	3145	867	2073	945.9	3.36	0.0000000
chrII	269145	271036	1892	885	841	145.24	1.95	0.1000000
chrII	299857	302297	2441	1774	1037	213.38	2.55	0.1300000
chrII	305671	307942	2272	1355	1050	230.86	2.29	0.0000000
chrII	309612	311974	2363	811	1338	683.75	3.48	0.0000000
chrII	323620	324983	1364	576	603	109.2	2.16	0.0900000
chrII	325724	327280	1557	567	656	87.1	2.06	0.1600000
chrII	336412	340194	3783	2201	2086	916.88	2.67	0.0000000
chrII	340261	343081	2821	1362	1852	1556.59	3.73	0.0000000
chrII	350426	351890	1465	609	724	278.66	3.04	0.0000000
chrII	355504	357319	1816	524	904	365.29	2.73	0.0000000
chrII	359611	360973	1363	688	693	291.21	3.29	0.0000000
chrII	369334	374502	5169	1717	2930	1569.93	3.73	0.0000000
chrII	374561	376854	2294	1527	1276	613.1	3.12	0.0000000
chrII	378162	379604	1443	760	764	308.27	3.18	0.0000000
chrII	379700	382092	2393	1786	1030	206.3	2.45	0.1200000
chrII	391079	393590	2512	651	1449	735.85	2.83	0.0000000
chrII	405394	409405	4012	2991	2533	1671.79	3.33	0.0000000
chrII	417884	420671	2788	1590	1683	1017.12	2.83	0.0000000
chrII	425591	427633	2043	1223	951	205.98	2.44	0.1200000
chrII	428793	429936	1144	561	479	60.48	2.44	0.1400000
chrII	435212	436536	1325	579	631	183.47	2.77	0.1200000
chrII	451610	453870	2261	591	993	239.75	2.5	0.0000000
chrII	457694	459383	1690	646	954	521.35	3.23	0.0000000
chrII	461077	462680	1604	845	789	252.08	2.61	0.0000000
chrII	465270	467651	2382	914	1273	533.23	3.04	0.0000000
chrII	473673	475004	1332	630	592	79.1	2.22	0.1600000
chrII	476859	479861	3003	1807	1912	753.24	2.3	0.0000000
chrII	483106	485120	2015	1406	995	214.93	2.51	0.1300000
chrII	487968	491825	3858	2932	2588	2000.32	3.57	0.0000000
chrII	492323	493613	1291	669	577	86.41	2.49	0.1600000
chrII	494800	495937	1138	594	503	82.21	2.89	0.1600000
chrII	503903	506044	2142	831	903	142.02	2.34	0.1000000
chrII	512217	513409	1193	533	490	50.61	2.26	0.2000000
chrII	531814	534215	2402	1638	1045	266.07	2.49	0.0000000
chrII	534532	536902	2371	742	1097	314.92	2.58	0.0000000
chrII	539259	540948	1690	553	752	169.31	2.15	0.1100000
chrII	554260	556566	2307	1117	1545	1543.69	3.56	0.0000000
chrII	560710	562061	1352	719	619	187.73	2.58	0.1200000
chrII	564361	566208	1848	1234	958	469.92	2.59	0.0000000
chrII	577542	578722	1181	581	482	67.04	2.15	0.1500000
chrII	581146	582880	1735	1072	747	125.48	2.45	0.1000000
chrII	594755	596482	1728	1017	913	398.51	3.13	0.0000000
chrII	611570	616316	4747	3577	2599	1000.93	2.59	0.0000000
chrII	617935	619481	1547	893	956	607.86	3.62	0.0000000
chrII	624338	626070	1733	683	960	430.36	2.82	0.0000000
chrII	628062	629566	1505	568	710	162.07	2.41	0.1100000
chrII	632906	634204	1299	657	584	102.77	2.48	0.0900000
chrII	642021	643371	1351	629	659	192.69	2.71	0.1200000
chrII	644798	646102	1305	760	542	91.98	2.07	0.1700000
chrII	646625	648059	1435	793	823	547.68	3.97	0.0000000
chrII	650527	653732	3206	777	1682	516.53	2.66	0.0000000
chrII	661894	663357	1464	747	676	165.97	2.51	0.1100000
chrII	669799	671004	1206	590	535	113.21	2.7	0.0900000
chrII	678721	681827	3107	1722	2023	1896.62	3.52	0.0000000
chrII	685992	687381	1390	658	722	301.85	3.16	0.0000000
chrII	697024	698664	1641	859	801	315.4	2.59	0.0000000
chrII	726483	729075	2593	1628	1203	406.41	2.56	0.0000000
chrII	741925	743168	1244	627	560	146.35	2.65	0.1000000
chrII	760720	761857	1138	562	476	85.96	2.81	0.1600000
chrII	770058	771673	1616	600	744	221.57	2.35	0.0000000
chrII	775393	776987	1595	899	669	66.77	1.73	0.1400000
chrII	782069	783231	1163	611	517	115.87	3.01	0.0900000
chrII	786225	787616	1392	745	669	214.74	2.7	0.1300000
chrII	799775	801466	1692	641	724	131.47	2.29	0.1000000
chrII	804289	805719	1431	635	701	220.91	2.72	0.0000000
chrII	810927	812025	1099	510	450	77.53	3.01	0.1500000
chrIII	1	860	860	230	525	398.64	4.32	0.0000000
chrIII	23717	25442	1726	1112	917	362.84	3.49	0.0000000
chrIII	34830	36063	1234	579	539	71.21	2.33	0.1500000
chrIII	40215	41608	1394	746	623	83.35	2.07	0.1600000
chrIII	47777	54631	6855	4840	4465	3100	3.79	0.0000000
chrIII	60658	62216	1559	992	746	156.25	2.11	0.1100000
chrIII	64916	66255	1340	662	809	447.33	4.25	0.0000000
chrIII	67806	70757	2952	908	1703	751.9	3.32	0.0000000
chrIII	75459	79045	3587	2793	2333	1492.68	4.52	0.0000000
chrIII	83819	87820	4002	1586	2378	579.52	2.36	0.0000000
chrIII	88000	92857	4858	2992	2487	476.1	2.57	0.0000000
chrIII	102644	108516	5873	709	3291	1484.41	3.82	0.0000000
chrIII	111213	112478	1266	567	568	99.1	2.53	0.0900000
chrIII	117852	126770	8919	5999	5832	2388.97	3.89	0.0000000
chrIII	126922	128460	1539	973	696	114.89	2.26	0.0900000
chrIII	131028	132322	1295	625	586	91.28	2.38	0.1600000
chrIII	136414	139673	3260	2116	2693	2260.06	3.44	0.0000000
chrIII	147007	148324	1318	707	564	103.57	2.22	0.0900000
chrIII	154740	158810	4071	3028	2508	1748.58	3.26	0.0000000
chrIII	162910	164620	1711	726	890	318.46	2.57	0.0000000
chrIII	167800	169889	2090	851	1145	323.45	2.33	0.0000000
chrIII	172075	174038	1964	566	828	89.33	2.27	0.1600000
chrIII	175976	177547	1572	550	677	118.53	2.3	0.0900000
chrIII	185370	186775	1406	601	725	302.19	3.24	0.0000000
chrIII	209690	211046	1357	709	586	91.26	2.31	0.1600000
chrIII	224882	227211	2330	521	1097	261.29	2.09	0.0000000
chrIII	227478	229314	1837	1237	1060	598.27	3	0.0000000
chrIII	235851	237316	1466	532	676	127.97	2.63	0.1000000
chrIII	237978	239496	1519	750	784	271.2	2.81	0.0000000
chrIII	239975	241119	1145	611	508	86.77	2.82	0.1600000
chrIII	251786	253554	1769	837	1288	1412.54	4.75	0.0000000
chrIII	264564	265754	1191	571	531	117.54	2.68	0.0900000
chrIII	279471	280727	1257	698	653	260.86	3.64	0.0000000
chrIII	293044	294856	1813	1344	815	111.68	2.28	0.0900000
chrIII	298619	299756	1138	643	446	57.49	2.26	0.2100000
chrIV	21753	23160	1408	733	698	260.61	2.92	0.0000000
chrIV	31538	32742	1205	600	556	144.36	3.04	0.1000000
chrIV	36112	37355	1244	588	530	82.15	2.26	0.1600000
chrIV	37927	39054	1128	558	474	60.64	2.64	0.1400000
chrIV	41662	43136	1475	669	804	340.5	3.35	0.0000000
chrIV	51576	52877	1302	621	681	281.27	3.59	0.0000000
chrIV	56083	57486	1404	575	659	174.17	3	0.1100000
chrIV	60561	63471	2911	1889	1579	781.27	2.92	0.0000000
chrIV	68240	69359	1120	567	444	51.09	2.3	0.2000000
chrIV	72776	74792	2017	614	999	338.72	3	0.0000000
chrIV	83193	84404	1212	543	507	57.19	2.33	0.2100000
chrIV	86958	88770	1813	604	796	150.88	2.33	0.1100000
chrIV	93406	95061	1656	825	791	226.98	2.2	0.0000000
chrIV	97635	98991	1357	831	604	119.63	2.51	0.0900000
chrIV	104173	105394	1222	644	514	59.91	2.24	0.1400000
chrIV	105991	107751	1761	1054	1029	590.16	3.41	0.0000000
chrIV	115500	116910	1411	684	660	162.06	2.66	0.1100000
chrIV	121030	122544	1515	735	1040	854.95	4.41	0.0000000
chrIV	124477	125651	1175	640	493	59.14	2.39	0.1400000
chrIV	125834	127196	1363	570	621	126.56	2.89	0.1000000
chrIV	131630	133754	2125	1540	961	182.65	2.17	0.1200000
chrIV	134050	136158	2109	770	1280	726.54	3.37	0.0000000
chrIV	144997	146269	1273	562	546	95.21	2.49	0.1700000
chrIV	147064	148909	1846	869	1047	594.04	3.13	0.0000000
chrIV	158140	159241	1102	556	436	56.07	2.5	0.2000000
chrIV	171604	173014	1411	651	722	341.58	3.06	0.0000000
chrIV	190284	191523	1240	566	605	199.55	3.38	0.1200000
chrIV	197791	199269	1479	666	840	434.06	3.85	0.0000000
chrIV	199305	200521	1217	660	520	72.45	2.46	0.1500000
chrIV	210560	211702	1143	594	474	58.62	2.59	0.2100000
chrIV	211766	213527	1762	1180	743	101.27	2.24	0.0900000
chrIV	215086	216689	1604	822	881	444.51	3.07	0.0000000
chrIV	220600	222847	2248	643	1248	619.6	3.38	0.0000000
chrIV	223377	224560	1184	618	497	50.72	2.36	0.2000000
chrIV	226524	227763	1240	616	543	98.83	2.59	0.0900000
chrIV	228363	231477	3115	2402	1524	466.77	2.51	0.0000000
chrIV	238205	242695	4491	1709	2810	1897.1	3.3	0.0000000
chrIV	247341	248549	1209	686	485	51.48	2.18	0.2000000
chrIV	258001	259128	1128	616	463	57.33	2.49	0.2100000
chrIV	263704	265781	2078	1547	891	111.12	1.9	0.0900000
chrIV	271250	272657	1408	690	779	469.59	3.79	0.0000000
chrIV	286033	287662	1630	772	993	726.16	3.51	0.0000000
chrIV	292061	293363	1303	659	559	84.86	2.27	0.1600000
chrIV	299567	303582	4016	3220	1828	398.54	2	0.0000000
chrIV	304227	305710	1484	854	782	316	3.06	0.0000000
chrIV	311943	313359	1417	816	671	162.42	2.45	0.1100000
chrIV	314093	317095	3003	850	1516	495.87	2.82	0.0000000
chrIV	321102	322494	1393	628	590	50.19	1.8	0.2000000
chrIV	325607	326882	1276	587	578	101.6	2.58	0.0900000
chrIV	329814	331537	1724	860	937	335.58	3.05	0.0000000
chrIV	333784	335491	1708	1055	848	184.48	2.23	0.1200000
chrIV	356559	360190	3632	693	1851	743.35	2.76	0.0000000
chrIV	360933	364267	3335	2621	1435	323.43	3.04	0.0000000
chrIV	365497	370089	4593	3193	3017	2789.24	3.53	0.0000000
chrIV	370650	372718	2069	578	938	243.28	2.78	0.0000000
chrIV	381042	383213	2172	616	920	207.05	2.94	0.1200000
chrIV	386410	387728	1319	799	569	116.4	2.39	0.0900000
chrIV	391680	393090	1411	687	697	230.54	2.82	0.0000000
chrIV	398661	400135	1475	737	862	485.24	3.91	0.0000000
chrIV	404276	405663	1388	699	825	497.65	4.17	0.0000000
chrIV	406860	408287	1428	834	702	196.35	2.6	0.1200000
chrIV	410000	414120	4121	1507	2531	1614.89	3.22	0.0000000
chrIV	414138	415395	1258	630	545	71.34	2.23	0.1500000
chrIV	421166	422532	1367	723	700	238.71	3.03	0.0000000
chrIV	426430	427587	1158	560	482	52.87	2.35	0.2000000
chrIV	430872	434771	3900	1247	2121	821.66	2.96	0.0000000
chrIV	437402	438607	1206	540	527	101.48	2.77	0.0900000
chrIV	441862	444072	2211	1111	991	190.37	2.42	0.1200000
chrIV	447065	448380	1316	717	618	153.89	2.82	0.1100000
chrIV	452164	455743	3580	896	1885	722.59	2.31	0.0000000
chrIV	460855	462939	2085	974	1090	327.64	2.32	0.0000000
chrIV	464704	466335	1632	698	773	162.6	2.31	0.1100000
chrIV	478197	479379	1183	570	507	67.47	2.46	0.1500000
chrIV	481964	484036	2073	601	780	57.77	1.81	0.2100000
chrIV	496834	498114	1281	588	552	51.59	2.12	0.2000000
chrIV	500801	502122	1322	570	615	138.59	2.65	0.1000000
chrIV	504288	505512	1225	617	565	147.73	2.98	0.1000000
chrIV	505550	508112	2563	1662	1518	994.61	3.15	0.0000000
chrIV	511767	513316	1550	674	724	104.87	2.12	0.0900000
chrIV	513369	515406	2038	553	942	57.68	2.18	0.2100000
chrIV	515848	520276	4429	3268	2518	465.06	2.36	0.0000000
chrIV	520627	522199	1573	1011	686	59.59	1.81	0.1400000
chrIV	524291	525599	1309	645	592	82.23	2.35	0.1600000
chrIV	529771	533539	3769	1662	1907	84.31	1.97	0.1600000
chrIV	533788	537424	3637	1590	1919	86.84	2.09	0.1600000
chrIV	538641	540385	1745	623	889	154.24	2.19	0.1100000
chrIV	541080	544940	3861	1284	2099	940.66	3.45	0.0000000
chrIV	544975	546996	2022	1248	994	294.05	2.9	0.0000000
chrIV	550205	552160	1956	1187	1294	991.81	3.26	0.0000000
chrIV	555191	557485	2295	1490	1426	706.72	2.62	0.0000000
chrIV	561970	563797	1828	783	1042	520.31	2.98	0.0000000
chrIV	568348	570443	2096	627	982	195.06	2.65	0.1200000
chrIV	575402	576611	1210	552	499	52.15	2.15	0.2000000
chrIV	587231	590151	2921	2254	1542	694.14	2.86	0.0000000
chrIV	590336	597232	6897	1451	4590	3100	3.5	0.0000000
chrIV	598963	603808	4846	1684	3169	2635.55	3.49	0.0000000
chrIV	613532	614717	1186	569	502	97.56	2.48	0.1700000
chrIV	615810	617757	1948	583	992	414.05	2.76	0.0000000
chrIV	629335	631217	1883	557	712	79.91	1.98	0.1600000
chrIV	635553	637468	1916	958	1332	1242.71	3.62	0.0000000
chrIV	644751	651764	7014	5791	4184	216.95	3	0.0000000
chrIV	654200	655511	1312	720	632	158.61	2.75	0.1100000
chrIV	666287	668725	2439	495	992	229.65	2.59	0.0000000
chrIV	679625	680870	1246	663	525	105.33	2.51	0.0900000
chrIV	681469	682795	1327	694	664	288.02	3.28	0.0000000
chrIV	690087	691519	1433	687	712	270.14	3.11	0.0000000
chrIV	693811	695031	1221	628	578	148.76	3.12	0.1000000
chrIV	699153	700529	1377	611	684	253.46	2.89	0.0000000
chrIV	703588	704872	1285	729	545	83.02	2.27	0.1600000
chrIV	714940	716077	1138	628	456	53.81	2.26	0.2000000
chrIV	720063	723546	3484	2699	2058	1397.47	2.93	0.0000000
chrIV	727166	728753	1588	1002	775	220.06	2.29	0.0000000
chrIV	739474	740604	1131	554	472	73.46	2.66	0.1500000
chrIV	746105	747248	1144	526	504	120.19	3.28	0.0900000
chrIV	750891	752083	1193	622	484	71.35	2.3	0.1500000
chrIV	754642	756107	1466	832	724	231.64	2.81	0.0000000
chrIV	764581	766066	1486	722	686	181.56	2.52	0.1200000
chrIV	767681	770732	3052	683	1908	1224.22	3.46	0.0000000
chrIV	788915	790852	1938	1369	751	104.21	2.52	0.0900000
chrIV	793722	795188	1467	759	803	398.52	3.41	0.0000000
chrIV	801824	805018	3195	582	1587	516.53	2.84	0.0000000
chrIV	805784	808820	3037	1623	1663	492.58	2.23	0.0000000
chrIV	811057	812840	1784	1008	1006	592.37	3.09	0.0000000
chrIV	813803	815062	1260	670	566	140.48	2.52	0.1000000
chrIV	816208	818456	2249	555	1065	370.73	2.9	0.0000000
chrIV	835128	836988	1861	808	1222	1178.24	3.9	0.0000000
chrIV	847416	848959	1544	523	738	235.78	2.5	0.0000000
chrIV	855554	856724	1171	520	485	58.08	2.35	0.2100000
chrIV	858719	859904	1186	657	500	77.1	2.52	0.1500000
chrIV	866453	868692	2240	1667	1124	373.29	2.56	0.0000000
chrIV	870329	874745	4417	2032	2372	356.07	2.19	0.0000000
chrIV	891676	893002	1327	665	621	137.61	2.72	0.1000000
chrIV	893266	894969	1704	1077	952	390	2.99	0.0000000
chrIV	910945	912179	1235	589	551	83.33	2.46	0.1600000
chrIV	913646	916816	3171	1855	2247	1706.05	2.87	0.0000000
chrIV	923285	925223	1939	703	1093	500.3	3.25	0.0000000
chrIV	925714	927796	2083	1412	1052	333.98	2.39	0.0000000
chrIV	929836	931241	1406	754	843	522.84	4.18	0.0000000
chrIV	935404	936879	1476	559	654	93.21	2.07	0.1700000
chrIV	945664	947016	1353	440	593	77.75	2.16	0.1500000
chrIV	953703	956084	2382	1729	1319	729.88	3.48	0.0000000
chrIV	959501	960870	1370	613	693	292.37	3.09	0.0000000
chrIV	976101	978031	1931	876	1005	429.48	2.72	0.0000000
chrIV	980142	984436	4295	1537	2292	397.02	2.19	0.0000000
chrIV	986350	993693	7344	5465	4686	718.93	3.1	0.0000000
chrIV	997969	999330	1362	883	560	63.1	2.06	0.1400000
chrIV	1010840	1012704	1865	1109	1166	812.99	3.62	0.0000000
chrIV	1012835	1017644	4810	1230	2887	1466.57	3.67	0.0000000
chrIV	1029872	1031158	1287	725	567	104.3	2.4	0.0900000
chrIV	1031196	1032551	1356	730	606	104.8	2.21	0.0900000
chrIV	1048923	1050913	1991	737	1138	597.37	2.84	0.0000000
chrIV	1054404	1056874	2471	779	1398	759.31	2.82	0.0000000
chrIV	1058386	1059708	1323	629	577	99.93	2.13	0.0900000
chrIV	1070964	1073858	2895	725	1328	271.65	3.04	0.0000000
chrIV	1074719	1076201	1483	737	655	117.64	2.22	0.0900000
chrIV	1079980	1081447	1468	653	652	159.07	2.23	0.1100000
chrIV	1084175	1085585	1411	961	579	89.1	2.02	0.1600000
chrIV	1095390	1101968	6579	1299	4107	526.05	2.96	0.0000000
chrIV	1107614	1108937	1324	668	574	127.98	2.27	0.1000000
chrIV	1111724	1112910	1187	649	478	63.6	2.26	0.1400000
chrIV	1124533	1126700	2168	1492	1183	588.96	3.32	0.0000000
chrIV	1126995	1128439	1445	576	730	261.64	2.73	0.0000000
chrIV	1128962	1130204	1243	658	615	215.46	3.44	0.1300000
chrIV	1135000	1136748	1749	772	1513	2245.55	5.83	0.0000000
chrIV	1140052	1141449	1398	678	736	272.89	3.09	0.0000000
chrIV	1145603	1146803	1201	609	530	51.33	2.46	0.2000000
chrIV	1150195	1151610	1416	647	623	67.33	2.07	0.1500000
chrIV	1153291	1158244	4954	1982	4487	3100	3.52	0.0000000
chrIV	1158813	1167310	8498	1770	7576	2620.03	3.66	0.0000000
chrIV	1168352	1169713	1362	718	707	192.88	3.05	0.1200000
chrIV	1173695	1176356	2662	723	1250	269.14	2.57	0.0000000
chrIV	1177593	1178938	1346	675	684	225.64	3.15	0.0000000
chrIV	1182410	1185132	2723	1296	1871	1482.69	3.13	0.0000000
chrIV	1188871	1190687	1817	863	989	456.52	2.76	0.0000000
chrIV	1201367	1202701	1335	550	613	182.7	2.72	0.1200000
chrIV	1206352	1212859	6508	1289	4009	560.81	2.98	0.0000000
chrIV	1218732	1219877	1146	580	461	61.02	2.41	0.1400000
chrIV	1221839	1223146	1308	611	662	302.09	3.5	0.0000000
chrIV	1226061	1227300	1240	543	520	95.82	2.25	0.1700000
chrIV	1227870	1230346	2477	1749	1125	340.49	2.95	0.0000000
chrIV	1232982	1234524	1543	739	759	245.34	2.62	0.0000000
chrIV	1235663	1237293	1631	593	654	76.63	2.05	0.1500000
chrIV	1241781	1243735	1955	812	1231	891.27	3.3	0.0000000
chrIV	1249463	1250741	1279	703	585	139.82	2.67	0.1000000
chrIV	1257689	1259230	1542	949	789	323.83	2.9	0.0000000
chrIV	1260940	1262156	1217	585	531	93.6	2.62	0.1700000
chrIV	1269119	1270347	1229	533	500	78.59	2.18	0.1600000
chrIV	1276130	1280528	4399	1211	2791	2220.61	3.54	0.0000000
chrIV	1287475	1289903	2429	1478	1238	390.47	2.29	0.0000000
chrIV	1293726	1295053	1328	643	760	416.94	4.17	0.0000000
chrIV	1305236	1306396	1161	573	488	67.07	2.43	0.1500000
chrIV	1317241	1318491	1251	620	582	149.14	2.86	0.1000000
chrIV	1318643	1320626	1984	885	1155	724.79	3.04	0.0000000
chrIV	1327969	1329237	1269	559	537	89.72	2.29	0.1600000
chrIV	1333357	1335161	1805	814	989	505.33	2.83	0.0000000
chrIV	1364056	1366534	2479	1820	1092	226.77	2.47	0.0000000
chrIV	1366548	1368098	1551	925	805	310.64	3.54	0.0000000
chrIV	1385230	1387382	2153	1625	1079	407.07	2.64	0.0000000
chrIV	1394418	1395596	1179	596	530	121.38	3.06	0.0900000
chrIV	1409716	1412744	3029	679	1744	893.24	2.86	0.0000000
chrIV	1416329	1417693	1365	776	632	184.82	2.53	0.1200000
chrIV	1419783	1421744	1962	1315	1088	632.61	3.09	0.0000000
chrIV	1426775	1427983	1209	585	498	78.56	2.23	0.1600000
chrIV	1428646	1429806	1161	541	472	63.54	2.21	0.1400000
chrIV	1433666	1435047	1382	686	606	124.65	2.26	0.1000000
chrIV	1435821	1437517	1697	900	1003	622.93	3.53	0.0000000
chrIV	1440541	1441707	1167	579	470	54.69	2.12	0.2000000
chrIV	1443113	1444440	1328	521	566	90.1	2.07	0.1600000
chrIV	1444560	1446357	1798	1204	827	166.33	2.66	0.1100000
chrIV	1458833	1460585	1753	753	1143	895.43	3.88	0.0000000
chrIV	1468216	1471520	3305	1146	1802	901.15	3.15	0.0000000
chrIV	1474562	1477679	3118	2295	1937	1094.43	3.23	0.0000000
chrIV	1488645	1491441	2797	1786	1641	926.8	3.34	0.0000000
chrIV	1495972	1498640	2669	736	1396	579.45	2.78	0.0000000
chrIV	1501737	1502970	1234	659	507	73.56	2.24	0.1500000
chrIV	1506582	1508032	1451	918	591	74.94	2.15	0.1500000
chrIX	1	7859	7859	3964	5452	1398.6	3.25	0.0000000
chrIX	21133	23117	1985	658	928	193.57	2.12	0.1200000
chrIX	34406	38028	3623	658	1663	433.8	2.56	0.0000000
chrIX	47025	48691	1667	786	849	298.31	2.43	0.0000000
chrIX	52653	57321	4669	2344	2726	1326.29	3.09	0.0000000
chrIX	60260	61385	1126	554	468	73.43	2.72	0.1500000
chrIX	82463	83974	1512	837	868	445.11	3.67	0.0000000
chrIX	92418	95156	2739	962	1616	900.61	2.71	0.0000000
chrIX	95763	97896	2134	643	1062	293.55	3.08	0.0000000
chrIX	117366	118569	1204	596	571	135.25	3.18	0.1000000
chrIX	121806	123033	1228	579	576	132.01	2.96	0.1000000
chrIX	125543	128271	2729	573	1227	230.58	2.59	0.0000000
chrIX	129402	130741	1340	636	601	123.05	2.46	0.1000000
chrIX	135454	136596	1143	594	462	60.3	2.3	0.1400000
chrIX	138256	140141	1886	1139	1080	664.25	3.18	0.0000000
chrIX	141509	143724	2216	1652	879	110.79	2.15	0.0900000
chrIX	148225	151920	3696	617	1670	529.35	3.33	0.0000000
chrIX	154378	156020	1643	739	753	190.77	2.18	0.1200000
chrIX	159496	161465	1970	775	1041	503.36	2.94	0.0000000
chrIX	165050	166626	1577	839	645	84.33	1.84	0.1600000
chrIX	169209	170393	1185	589	519	92.56	2.68	0.1700000
chrIX	173074	174408	1335	752	602	99.03	2.32	0.0900000
chrIX	176803	178307	1505	774	745	234.2	2.93	0.0000000
chrIX	179802	180958	1157	589	476	59.27	2.35	0.1400000
chrIX	188216	189438	1223	642	574	147.59	3.01	0.1000000
chrIX	198895	200767	1873	1182	913	248.74	2.29	0.0000000
chrIX	204353	208427	4075	2981	2578	432.4	3.29	0.0000000
chrIX	214469	217212	2744	1578	1299	235.45	2.24	0.0000000
chrIX	220220	221578	1359	727	656	140.81	2.62	0.1000000
chrIX	222039	223333	1295	582	573	75.67	2.42	0.1500000
chrIX	234956	236132	1177	608	500	52.43	2.38	0.2000000
chrIX	243240	245154	1915	1232	1126	564.35	3.52	0.0000000
chrIX	248228	250343	2116	1129	1427	1166.64	3.75	0.0000000
chrIX	253512	256319	2808	1214	1891	1638.34	4.23	0.0000000
chrIX	256816	259226	2411	1732	1314	609.74	3.09	0.0000000
chrIX	267370	269139	1770	675	848	255.16	2.56	0.0000000
chrIX	270255	271504	1250	572	550	103.91	2.62	0.0900000
chrIX	275548	277135	1588	746	1040	877.13	4.51	0.0000000
chrIX	282270	283475	1206	594	589	193.06	3.6	0.1200000
chrIX	288368	291045	2678	622	1438	607.79	4.3	0.0000000
chrIX	291113	292929	1817	709	814	167.68	2.36	0.1100000
chrIX	299507	300699	1193	550	541	117.22	2.97	0.0900000
chrIX	303594	304956	1363	665	629	153.77	2.6	0.1100000
chrIX	309901	311622	1722	1167	724	83.95	2.08	0.1600000
chrIX	312214	313375	1162	604	498	61.08	2.5	0.1400000
chrIX	320411	322441	2031	565	1015	302.13	2.83	0.0000000
chrIX	332278	333997	1720	1162	861	254.32	2.44	0.0000000
chrIX	338176	339519	1344	622	563	64.28	1.98	0.1400000
chrIX	343203	344649	1447	638	684	133.13	2.24	0.1000000
chrIX	349586	350911	1326	765	590	95.47	2.31	0.1700000
chrIX	369241	371011	1771	681	950	370.83	3.36	0.0000000
chrIX	377781	379004	1224	703	562	117.17	2.59	0.0900000
chrIX	380565	385124	4560	3326	2606	1492.76	2.63	0.0000000
chrIX	414275	416549	2275	1425	1162	326.33	2.32	0.0000000
chrIX	421971	425213	3243	953	1523	273.78	2.49	0.0000000
chrV	1	1526	1526	223	857	182.22	2.71	0.1200000
chrV	1671	6760	5090	2102	3474	1138.83	3.26	0.0000000
chrV	15472	17142	1671	561	708	142.63	2.24	0.1000000
chrV	33054	34185	1132	572	453	52.05	2.24	0.2000000
chrV	39264	43812	4549	3369	2232	590.25	2.32	0.0000000
chrV	57657	59566	1910	682	1106	547.03	4.08	0.0000000
chrV	60286	62707	2422	669	1072	121.03	2.22	0.0900000
chrV	68195	70949	2755	1250	1785	1342.45	3.24	0.0000000
chrV	76905	78204	1300	595	593	102.16	2.48	0.0900000
chrV	79310	81114	1805	1091	1002	425.6	3.03	0.0000000
chrV	84212	87354	3143	865	2501	2816.14	4.54	0.0000000
chrV	89363	90882	1520	823	831	293.84	3.25	0.0000000
chrV	98911	101979	3069	1260	1584	518.46	2.58	0.0000000
chrV	105642	107688	2047	548	945	154.86	2.22	0.1100000
chrV	116684	118571	1888	1153	1199	803.75	3.9	0.0000000
chrV	122533	124127	1595	608	806	301.72	2.77	0.0000000
chrV	128001	129198	1198	596	530	96.66	2.64	0.1700000
chrV	130648	136276	5629	2284	3584	2410.96	3.43	0.0000000
chrV	140068	142216	2149	832	1474	1261.28	4.02	0.0000000
chrV	143430	144976	1547	700	763	188.8	2.57	0.1200000
chrV	149465	153997	4533	3658	2603	1292.14	2.74	0.0000000
chrV	158847	160788	1942	681	903	162.4	2.55	0.1100000
chrV	166610	168356	1747	977	881	265.44	2.85	0.0000000
chrV	171319	172849	1531	654	712	141.29	2.44	0.1000000
chrV	176709	179135	2427	1078	1201	316.95	2.93	0.0000000
chrV	191291	193357	2067	1227	1046	253.76	2.35	0.0000000
chrV	193399	195850	2452	1568	1464	869.51	2.92	0.0000000
chrV	196220	197531	1312	700	619	149.03	2.7	0.1000000
chrV	209802	210989	1188	644	514	80.89	2.5	0.1600000
chrV	211145	213898	2754	2088	1354	418.17	2.35	0.0000000
chrV	221051	223918	2868	2023	1664	908.71	2.76	0.0000000
chrV	224807	226219	1413	784	675	204.88	2.79	0.1200000
chrV	236773	239094	2322	1688	1235	581.63	2.56	0.0000000
chrV	241349	243441	2093	1073	1421	1313.79	3.68	0.0000000
chrV	249460	250705	1246	544	514	77.82	2.32	0.1500000
chrV	253902	255108	1207	475	506	72.71	2.35	0.1500000
chrV	259015	262473	3459	1026	1957	934.28	3.2	0.0000000
chrV	263566	265094	1529	819	755	252.2	2.77	0.0000000
chrV	265379	266747	1369	797	694	213.33	2.9	0.1300000
chrV	267937	269531	1595	829	912	516.14	3.05	0.0000000
chrV	270714	272951	2238	1661	1092	329.27	2.67	0.0000000
chrV	280423	282885	2463	1124	1556	1074.3	3.63	0.0000000
chrV	283964	285711	1748	911	1059	658.62	3.3	0.0000000
chrV	286650	287816	1167	576	492	50.08	2.38	0.2000000
chrV	290824	293401	2578	972	1859	1447.21	3.06	0.0000000
chrV	300825	305417	4593	2762	2635	1431.35	3.37	0.0000000
chrV	311007	312526	1520	733	795	260.96	2.54	0.0000000
chrV	317754	319303	1550	835	773	231.01	2.88	0.0000000
chrV	334170	338235	4066	1384	2395	1272.04	3.56	0.0000000
chrV	342055	343978	1924	667	891	177.38	2.12	0.1100000
chrV	347205	350176	2972	2224	1546	381.37	3.38	0.0000000
chrV	354447	355900	1454	615	797	316.23	3.05	0.0000000
chrV	358604	359969	1366	496	587	70.72	2.01	0.1500000
chrV	394782	397083	2302	1745	1023	181.77	2.36	0.1200000
chrV	400007	402885	2879	868	1540	739.78	3.55	0.0000000
chrV	403845	405058	1214	536	507	68.47	2.26	0.1500000
chrV	409067	410373	1307	668	669	234.72	3.36	0.0000000
chrV	416085	417303	1219	650	535	99.58	2.52	0.0900000
chrV	421971	423870	1900	805	984	377.03	2.46	0.0000000
chrV	430421	433619	3199	1816	2023	1296.31	3.13	0.0000000
chrV	434126	436347	2222	1451	1215	491.93	2.96	0.0000000
chrV	437258	440074	2817	2045	1649	799.12	3.61	0.0000000
chrV	441531	449918	8388	792	5944	108.25	3.99	0.0900000
chrV	452746	453924	1179	591	503	56.8	2.43	0.2100000
chrV	459648	460966	1319	654	643	201.02	2.84	0.1200000
chrV	461127	463926	2800	1497	1668	1083.79	3.08	0.0000000
chrV	464538	465697	1160	577	503	92.8	2.85	0.1700000
chrV	467268	469069	1802	769	838	222.19	2.31	0.0000000
chrV	473357	475980	2624	1480	1509	815.9	2.54	0.0000000
chrV	490247	493410	3164	724	1765	570.68	2.81	0.0000000
chrV	495273	498784	3512	2098	2482	774.4	2.81	0.0000000
chrV	502450	505617	3168	1405	1826	948.83	3.45	0.0000000
chrV	517012	518216	1205	576	512	65.23	2.42	0.1400000
chrV	522116	523579	1464	519	685	198.62	2.76	0.1200000
chrV	543688	547444	3757	1106	2446	2035.9	3.26	0.0000000
chrV	558498	559757	1260	710	629	212.63	3.49	0.1300000
chrV	569590	572374	2785	1086	1695	461.09	2.82	0.0000000
chrVI	5	5313	5309	2692	4105	1623.63	3.26	0.0000000
chrVI	16024	17391	1368	490	586	111.16	2.19	0.0900000
chrVI	26830	28828	1999	650	1030	479.08	2.49	0.0000000
chrVI	45022	46178	1157	623	466	60.44	2.25	0.1400000
chrVI	52872	57026	4155	3514	2490	1656.31	3.82	0.0000000
chrVI	74015	77761	3747	2621	1844	638.22	2.34	0.0000000
chrVI	81472	82777	1306	769	557	97.49	2.43	0.1700000
chrVI	94674	96588	1915	1156	1133	798.52	3.66	0.0000000
chrVI	102562	104154	1593	1011	723	169	2.22	0.1100000
chrVI	105274	108001	2728	1516	1437	596.72	2.69	0.0000000
chrVI	109265	110604	1340	683	799	444.95	3.88	0.0000000
chrVI	114301	116449	2149	1617	902	88.73	2.17	0.1600000
chrVI	129498	130812	1315	694	642	148.33	2.78	0.1000000
chrVI	137516	141159	3644	1098	2165	555.5	2.48	0.0000000
chrVI	141455	144245	2791	2212	1274	60.67	2.01	0.1400000
chrVI	152545	154155	1611	825	971	579.31	3.92	0.0000000
chrVI	164424	165617	1194	557	513	53.51	2.35	0.2000000
chrVI	172784	177561	4778	3905	3279	2130.05	3.57	0.0000000
chrVI	181999	185078	3080	2187	1747	730.45	2.86	0.0000000
chrVI	191055	192719	1665	535	715	75.22	2.55	0.1500000
chrVI	195851	197294	1444	757	690	129.78	2.47	0.1000000
chrVI	202874	204155	1282	642	575	77.31	2.42	0.1500000
chrVI	209713	211381	1669	1055	795	173.94	2.53	0.1100000
chrVI	223488	227198	3711	2729	2016	947.69	2.5	0.0000000
chrVI	228572	229833	1262	603	630	186.8	3.3	0.1200000
chrVI	233144	234562	1419	832	705	250.05	3.38	0.0000000
chrVI	240790	242305	1516	617	762	268.83	3.3	0.0000000
chrVI	245594	246710	1117	591	461	72.72	2.79	0.1500000
chrVI	249296	250486	1191	579	532	118.1	2.9	0.0900000
chrVI	251132	256867	5736	683	4050	3100	4.13	0.0000000
chrVI	262649	264410	1762	696	835	290.29	2.42	0.0000000
chrVII	22622	25748	3127	679	1607	613.93	2.93	0.0000000
chrVII	26956	28110	1155	535	495	77.21	2.77	0.1500000
chrVII	34793	36187	1395	706	618	143.75	2.32	0.1000000
chrVII	49006	50113	1108	581	446	53.51	2.45	0.2000000
chrVII	52922	54134	1213	680	504	55.94	2.16	0.2000000
chrVII	66529	68156	1628	645	923	502.86	3.17	0.0000000
chrVII	72685	75084	2400	533	1067	137.68	1.76	0.1000000
chrVII	80527	81849	1323	718	674	257.98	3.4	0.0000000
chrVII	83644	84879	1236	561	572	178.14	3.08	0.1100000
chrVII	93156	96175	3020	577	1942	1689.48	3.81	0.0000000
chrVII	106906	108084	1179	600	510	90.55	2.68	0.1600000
chrVII	115030	116411	1382	520	627	135.07	2.34	0.1000000
chrVII	121850	125150	3301	1780	1857	1016.17	3.13	0.0000000
chrVII	130718	132106	1389	831	711	233.56	3.05	0.0000000
chrVII	143552	145378	1827	589	921	386.54	2.52	0.0000000
chrVII	147192	148634	1443	648	631	125.63	2.21	0.1000000
chrVII	157189	158485	1297	689	611	135.51	2.66	0.1000000
chrVII	158553	160069	1517	779	760	254.05	2.82	0.0000000
chrVII	164534	168328	3795	1493	2462	2093.46	3.95	0.0000000
chrVII	179793	181479	1687	891	1223	1266.29	4.47	0.0000000
chrVII	189963	191825	1863	960	1188	848.75	3.96	0.0000000
chrVII	196828	198422	1595	678	761	184.59	2.35	0.1200000
chrVII	199613	200967	1355	608	698	258.75	3.32	0.0000000
chrVII	201950	203095	1146	590	490	63.23	2.67	0.1400000
chrVII	205176	207187	2012	1410	934	241.09	2.52	0.0000000
chrVII	215485	216684	1200	529	505	65.64	2.39	0.1400000
chrVII	216845	218029	1185	705	497	63.16	2.38	0.1400000
chrVII	225189	226757	1569	569	753	210.15	2.51	0.1200000
chrVII	268564	272846	4283	2397	2432	1141.2	2.99	0.0000000
chrVII	276477	277890	1414	565	658	108.39	2.31	0.0900000
chrVII	279882	281819	1938	871	1039	407.84	2.6	0.0000000
chrVII	286724	288436	1713	634	761	150.59	2.95	0.1100000
chrVII	291336	292533	1198	527	504	59.3	2.32	0.1400000
chrVII	305781	307894	2114	834	1114	476.46	3.72	0.0000000
chrVII	319154	320571	1418	903	716	175.7	2.62	0.1100000
chrVII	323435	325875	2441	1394	1078	266.77	2.85	0.0000000
chrVII	330156	331367	1212	612	548	120.31	2.79	0.0900000
chrVII	334136	335312	1177	525	493	69.79	2.46	0.1500000
chrVII	345371	347684	2314	1618	1217	452.41	2.41	0.0000000
chrVII	355083	356292	1210	655	520	69.41	2.44	0.1500000
chrVII	357875	359198	1324	655	630	182.48	2.85	0.1200000
chrVII	367868	369238	1371	778	575	56.18	1.87	0.2100000
chrVII	370380	372065	1686	855	948	439.71	2.83	0.0000000
chrVII	374317	375692	1376	784	653	136.59	2.53	0.1000000
chrVII	376880	378062	1183	568	513	85.15	2.59	0.1600000
chrVII	382875	386156	3282	1683	1554	369.53	2.25	0.0000000
chrVII	397567	400657	3091	726	1886	1186.18	3.62	0.0000000
chrVII	400800	403069	2270	607	1142	401.14	2.5	0.0000000
chrVII	403644	406220	2577	610	1187	270.66	2.28	0.0000000
chrVII	410823	414581	3759	2688	2272	1299.71	2.99	0.0000000
chrVII	420134	421498	1365	563	621	104.07	2.48	0.0900000
chrVII	422623	423946	1324	537	645	141.12	2.78	0.1000000
chrVII	426445	429218	2774	2177	1638	966.97	2.7	0.0000000
chrVII	432433	434642	2210	1109	1451	1223.1	3.56	0.0000000
chrVII	451596	453069	1474	774	925	610.12	4.37	0.0000000
chrVII	459083	460283	1201	613	508	69.65	2.34	0.1500000
chrVII	471744	473382	1639	681	738	98.4	1.96	0.1700000
chrVII	474579	476188	1610	708	896	357.78	3.13	0.0000000
chrVII	479706	486170	6465	4715	3935	2278.8	3.68	0.0000000
chrVII	493718	495049	1332	753	602	89.53	2.32	0.1600000
chrVII	497320	499150	1831	767	734	59.12	1.89	0.1400000
chrVII	499258	500495	1238	644	546	88.27	2.54	0.1600000
chrVII	505379	509315	3937	3232	2278	983.3	3.18	0.0000000
chrVII	510382	511689	1308	672	602	99.43	2.5	0.0900000
chrVII	524289	529896	5608	4485	3624	2712.09	4.2	0.0000000
chrVII	534400	540476	6077	2228	3930	783.82	3.08	0.0000000
chrVII	543013	545692	2680	636	1261	213.25	2.27	0.1300000
chrVII	545873	549029	3157	2604	1676	752.26	2.88	0.0000000
chrVII	558535	560994	2460	1612	1257	282.59	2.22	0.0000000
chrVII	561080	568053	6974	5767	4280	290.04	2.93	0.0000000
chrVII	568425	571258	2834	618	1430	80.63	2.07	0.1600000
chrVII	571616	575113	3498	2545	2002	477.94	2.34	0.0000000
chrVII	576112	577387	1276	636	573	60.03	2.24	0.1400000
chrVII	581128	582443	1316	578	631	177.83	2.72	0.1100000
chrVII	583456	585354	1899	896	1125	698.19	3.13	0.0000000
chrVII	590440	593884	3445	2370	2014	1185.46	3.28	0.0000000
chrVII	598438	599755	1318	740	643	219.88	3.07	0.0000000
chrVII	608850	610826	1977	1361	1259	1084.84	3.95	0.0000000
chrVII	624522	626341	1820	1084	1031	590.03	2.84	0.0000000
chrVII	647606	652146	4541	3401	2357	791.32	2.45	0.0000000
chrVII	652754	657199	4446	1555	3054	2351	3.34	0.0000000
chrVII	676260	679228	2969	1701	1715	1012.47	3.08	0.0000000
chrVII	699146	703657	4512	630	2441	1201.64	3.38	0.0000000
chrVII	708218	710181	1964	1065	1290	502.38	3.45	0.0000000
chrVII	712995	714305	1311	727	625	129.75	2.62	0.1000000
chrVII	718188	719379	1192	643	528	66.92	2.62	0.1500000
chrVII	719522	720943	1422	778	732	270.84	3.06	0.0000000
chrVII	726090	727393	1304	684	551	79.27	2.24	0.1600000
chrVII	729101	730315	1215	622	522	72.66	2.41	0.1500000
chrVII	730738	731991	1254	674	510	74.71	1.98	0.1500000
chrVII	732097	734393	2297	1267	1507	1412.3	4.53	0.0000000
chrVII	738765	740385	1621	875	869	477.18	3.12	0.0000000
chrVII	744728	747100	2373	1789	1069	276.4	2.36	0.0000000
chrVII	752193	755049	2857	2135	1698	1094.33	3.32	0.0000000
chrVII	755850	758066	2217	741	1051	214.42	2.58	0.1300000
chrVII	760489	762545	2057	718	1007	342.26	3.19	0.0000000
chrVII	765590	767785	2196	1150	1370	975.7	3.69	0.0000000
chrVII	769971	773717	3747	1905	1701	364.68	2.86	0.0000000
chrVII	774054	775430	1377	765	620	112.38	2.12	0.0900000
chrVII	779205	780443	1239	648	545	81.8	2.43	0.1600000
chrVII	784759	787517	2759	727	1661	982.37	3.12	0.0000000
chrVII	787777	789396	1620	928	806	251.72	2.35	0.0000000
chrVII	797549	799027	1479	739	779	289.16	3.09	0.0000000
chrVII	799679	800934	1256	698	594	149.71	3.01	0.1000000
chrVII	801042	802799	1758	747	897	271.13	2.44	0.0000000
chrVII	808884	814167	5284	1011	3375	1865.45	3.06	0.0000000
chrVII	814646	818173	3528	2931	1732	66.49	2.02	0.1400000
chrVII	819795	824189	4395	2630	2867	563.79	2.95	0.0000000
chrVII	828204	829708	1505	922	703	120.45	2.49	0.0900000
chrVII	831754	833207	1454	671	885	549	4.14	0.0000000
chrVII	836526	837711	1186	574	546	106.34	3.02	0.0900000
chrVII	845231	846971	1741	1137	857	243.01	2.33	0.0000000
chrVII	848144	849522	1379	758	664	185.07	2.57	0.1200000
chrVII	850222	851651	1430	596	599	78.77	2.07	0.1600000
chrVII	856046	860417	4372	811	2748	1971.4	3.41	0.0000000
chrVII	866848	868428	1581	676	1015	723.01	3.69	0.0000000
chrVII	877873	880595	2723	1656	1516	595.48	2.64	0.0000000
chrVII	882058	885001	2944	1037	2490	2207.67	3.84	0.0000000
chrVII	893541	895210	1670	875	883	291.11	2.91	0.0000000
chrVII	904183	906514	2332	1173	1563	1222.89	4.07	0.0000000
chrVII	908192	909905	1714	796	847	215.09	2.34	0.1300000
chrVII	912806	914078	1273	613	550	71.42	2.16	0.1500000
chrVII	919313	920896	1584	1089	640	68.72	2.01	0.1500000
chrVII	921498	922769	1272	640	578	131.07	2.67	0.1000000
chrVII	931402	932618	1217	542	520	78.51	2.5	0.1600000
chrVII	936265	937539	1275	664	597	184.63	2.87	0.1200000
chrVII	939005	940352	1348	928	524	55.2	1.89	0.2000000
chrVII	941712	942910	1199	472	479	60.8	2.09	0.1400000
chrVII	952882	954568	1687	619	1012	687.11	3.44	0.0000000
chrVII	958107	960436	2330	1111	1485	1248.61	3.61	0.0000000
chrVII	961500	963623	2124	679	1093	474.25	2.92	0.0000000
chrVII	968043	970707	2665	573	1244	359.34	2.93	0.0000000
chrVII	973644	975199	1556	752	789	298.06	2.77	0.0000000
chrVII	976117	979992	3876	900	1675	440.3	2.46	0.0000000
chrVII	984031	985298	1268	732	507	65.91	2.03	0.1400000
chrVII	985408	990957	5550	2389	3082	1743.55	2.81	0.0000000
chrVII	993272	994945	1674	922	963	596.84	3.23	0.0000000
chrVII	998518	1002929	4412	2992	3660	3100	3.68	0.0000000
chrVII	1025417	1027906	2490	1844	1644	1540.67	3.4	0.0000000
chrVII	1042565	1043796	1232	558	515	98.88	2.46	0.0900000
chrVII	1051412	1053203	1792	808	917	430	2.86	0.0000000
chrVII	1068855	1070857	2003	1417	890	196.56	2.38	0.1200000
chrVII	1075531	1076891	1361	644	647	187.15	2.73	0.1200000
chrVII	1083896	1086504	2609	777	1738	545.6	3.29	0.0000000
chrVIII	1	1607	1607	729	979	104.89	2.02	0.0900000
chrVIII	2128	5558	3431	1267	2389	1003.34	3.72	0.0000000
chrVIII	15431	19008	3578	1919	1793	737.9	2.43	0.0000000
chrVIII	25126	27102	1977	441	759	56.62	1.73	0.2100000
chrVIII	33626	34864	1239	504	518	61.27	2.27	0.1400000
chrVIII	38008	40622	2615	1378	1210	297.74	2.4	0.0000000
chrVIII	47591	49062	1472	730	782	318.74	3.32	0.0000000
chrVIII	50425	51682	1258	668	530	59.88	2.22	0.1400000
chrVIII	53956	56642	2687	935	1770	1391.62	3.15	0.0000000
chrVIII	64021	68186	4166	2052	2319	847.39	2.73	0.0000000
chrVIII	74062	75663	1602	939	690	119.9	2.13	0.0900000
chrVIII	97714	99690	1977	761	1122	709.43	2.94	0.0000000
chrVIII	101497	103321	1825	1168	1075	579.95	2.81	0.0000000
chrVIII	104635	106356	1722	734	747	111.17	2.37	0.0900000
chrVIII	107044	109415	2372	1381	1186	384.85	2.25	0.0000000
chrVIII	114840	116551	1712	1062	836	226.8	2.41	0.0000000
chrVIII	121325	124411	3087	1292	2061	1541.25	3.74	0.0000000
chrVIII	125413	126688	1276	596	547	69.35	2.17	0.1500000
chrVIII	128605	129966	1362	843	582	50.11	2.15	0.2000000
chrVIII	150363	151755	1393	587	615	119.22	2.15	0.0900000
chrVIII	160044	161486	1443	704	713	206.72	3.07	0.1200000
chrVIII	164131	165381	1251	618	595	157.23	3.05	0.1100000
chrVIII	187012	188212	1201	568	494	77.05	2.28	0.1500000
chrVIII	188972	190996	2025	1120	1097	562.46	2.95	0.0000000
chrVIII	208690	210106	1417	824	659	69.19	2.34	0.1500000
chrVIII	211861	216626	4766	1019	5390	3100	3.02	0.0000000
chrVIII	235575	238325	2751	887	1282	407.68	2.59	0.0000000
chrVIII	241297	243047	1751	1172	770	144.39	2.73	0.1000000
chrVIII	255680	256901	1222	675	507	65.56	2.23	0.1400000
chrVIII	266412	267795	1384	669	674	213.94	2.78	0.1300000
chrVIII	271776	272993	1218	674	487	55.02	2.07	0.2000000
chrVIII	279546	281891	2346	977	1573	1295.04	3.59	0.0000000
chrVIII	284075	285415	1341	585	579	54.18	2.19	0.2000000
chrVIII	286142	290643	4502	3443	2718	1554.63	2.89	0.0000000
chrVIII	292247	294857	2611	1677	1428	573.98	2.99	0.0000000
chrVIII	296346	299676	3331	2458	1913	903.72	3.09	0.0000000
chrVIII	301467	302782	1316	616	565	62.81	2.17	0.1400000
chrVIII	315405	316949	1545	947	805	222.81	2.49	0.0000000
chrVIII	319416	320622	1207	616	522	71.66	2.49	0.1500000
chrVIII	322728	324046	1319	609	551	62.66	1.97	0.1400000
chrVIII	324136	326122	1987	1415	829	79.79	1.98	0.1600000
chrVIII	331910	333460	1551	1017	614	51.3	1.86	0.2000000
chrVIII	335189	336914	1726	594	822	234.98	2.29	0.0000000
chrVIII	340886	342863	1978	655	1034	407.63	2.56	0.0000000
chrVIII	367454	368779	1326	551	556	82.18	2.31	0.1600000
chrVIII	369383	370598	1216	669	516	78.64	2.47	0.1600000
chrVIII	373707	375704	1998	682	1106	557.78	4.01	0.0000000
chrVIII	376833	378454	1622	984	753	188.57	2.66	0.1200000
chrVIII	380764	382098	1335	502	541	57.14	1.95	0.2100000
chrVIII	382465	383734	1270	502	527	73.44	2.08	0.1500000
chrVIII	406407	407580	1174	666	502	74.67	2.75	0.1500000
chrVIII	416711	417953	1243	550	574	128.61	2.76	0.1000000
chrVIII	421840	423995	2156	709	1092	382.36	3.01	0.0000000
chrVIII	449992	453353	3362	1954	2846	2752.29	3.02	0.0000000
chrVIII	454977	456653	1677	708	729	97.99	1.92	0.1700000
chrVIII	460963	462751	1789	1104	818	192.46	2.24	0.1200000
chrVIII	483287	485289	2003	1291	1006	354.23	2.35	0.0000000
chrVIII	487208	489253	2046	1448	1007	325.43	2.56	0.0000000
chrVIII	489893	491213	1321	702	562	89.3	2.24	0.1600000
chrVIII	496613	498001	1389	630	669	182.27	2.78	0.1200000
chrVIII	498092	499742	1651	987	876	361.94	3.04	0.0000000
chrVIII	505248	506487	1240	577	526	93.92	2.46	0.1700000
chrVIII	521537	523610	2074	1460	1003	238.46	2.7	0.0000000
chrVIII	546408	550012	3605	2515	2563	1101.08	3.08	0.0000000
chrX	1	7332	7332	3917	5263	1329.09	3.22	0.0000000
chrX	30408	32105	1698	1052	741	163.85	2.09	0.1100000
chrX	35884	38455	2572	851	1590	1245.08	3.7	0.0000000
chrX	49546	50874	1329	552	566	103.3	2.28	0.0900000
chrX	59563	60861	1299	521	583	94.98	2.37	0.1700000
chrX	63007	64227	1221	556	529	62.7	2.28	0.1400000
chrX	82696	84578	1883	1322	866	154.18	2.49	0.1100000
chrX	89780	91160	1381	744	594	72.91	2.02	0.1500000
chrX	93912	95634	1723	659	949	385.07	2.75	0.0000000
chrX	100156	101909	1754	880	934	377.79	2.65	0.0000000
chrX	105648	107550	1903	698	853	141.52	1.91	0.1000000
chrX	108971	112243	3273	763	1974	1204.63	3.33	0.0000000
chrX	115263	118422	3160	1780	1718	652.14	2.46	0.0000000
chrX	118661	122405	3745	1176	2906	3100	3.34	0.0000000
chrX	135876	137659	1784	577	819	225.62	2.29	0.0000000
chrX	139167	140647	1481	435	601	70.93	1.94	0.1500000
chrX	142468	143607	1140	567	464	59.03	2.35	0.1400000
chrX	145988	147722	1735	1081	838	225.19	2.89	0.0000000
chrX	149980	151567	1588	889	895	464.93	3.27	0.0000000
chrX	159246	160951	1706	1156	799	228.51	2.15	0.0000000
chrX	177158	178369	1212	617	541	100.98	2.69	0.0900000
chrX	179790	183049	3260	1247	2117	1550.46	3.48	0.0000000
chrX	194922	196331	1410	560	595	88.66	1.98	0.1600000
chrX	203542	205770	2229	1694	1063	219.77	2.41	0.0000000
chrX	207262	208502	1241	680	536	59.88	2.22	0.1400000
chrX	219609	221259	1651	983	867	317.33	2.7	0.0000000
chrX	227436	229012	1577	595	790	187.23	2.58	0.1200000
chrX	230571	231800	1230	544	519	68.12	2.26	0.1500000
chrX	236020	237846	1827	677	971	403.39	2.43	0.0000000
chrX	256183	257702	1520	575	710	176.17	2.58	0.1100000
chrX	277851	279525	1675	980	866	382.09	3.55	0.0000000
chrX	280210	281508	1299	663	597	153.23	2.68	0.1100000
chrX	290257	292564	2308	1152	1220	413.6	2.4	0.0000000
chrX	292603	295759	3157	1875	1893	1341.78	3.43	0.0000000
chrX	313479	317703	4225	3228	2532	1693.44	4.33	0.0000000
chrX	332583	334766	2184	783	1423	1174.91	4.87	0.0000000
chrX	336875	339924	3050	2039	2299	2004.54	3.5	0.0000000
chrX	347497	350173	2677	1750	1385	376.38	2.44	0.0000000
chrX	351720	352849	1130	562	475	60.09	2.64	0.1400000
chrX	354968	356180	1213	536	516	91.62	2.85	0.1700000
chrX	360204	361807	1604	725	856	305.92	2.62	0.0000000
chrX	373568	375087	1520	927	732	159.9	2.53	0.1100000
chrX	377984	379297	1314	693	611	119.42	2.82	0.0900000
chrX	380347	384025	3679	737	1761	343.21	2.42	0.0000000
chrX	390602	392853	2252	1016	1452	1037.14	3.28	0.0000000
chrX	401742	403039	1298	708	602	112.75	2.58	0.0900000
chrX	404224	405972	1749	862	1051	626.87	3.24	0.0000000
chrX	406816	408149	1334	753	656	186.03	3.09	0.1200000
chrX	412790	414150	1361	596	740	299.57	3.51	0.0000000
chrX	423698	425546	1849	639	945	299.65	3.1	0.0000000
chrX	431527	433138	1612	588	781	212.07	2.62	0.1200000
chrX	434043	435946	1904	653	1186	758.5	3.43	0.0000000
chrX	436249	437503	1255	627	520	55.85	2.06	0.2000000
chrX	445174	446479	1306	691	637	143.12	2.73	0.1000000
chrX	451608	456470	4863	2631	2998	1216.59	3.33	0.0000000
chrX	465813	469006	3194	1172	1869	947.83	3.28	0.0000000
chrX	472113	482734	10622	6823	7106	110.95	3.01	0.0900000
chrX	495888	497160	1273	571	577	135.72	2.79	0.1000000
chrX	503037	504473	1437	850	693	210.2	2.86	0.1200000
chrX	518638	522533	3896	560	2095	850.51	2.65	0.0000000
chrX	523594	525202	1609	455	697	100.81	2.14	0.0900000
chrX	525588	527237	1650	504	689	79.56	2.07	0.1600000
chrX	544607	546450	1844	883	1096	540.57	3.19	0.0000000
chrX	554259	556490	2232	575	1031	223.2	2.45	0.0000000
chrX	558502	559964	1463	617	797	347.03	3.35	0.0000000
chrX	571837	574312	2476	1301	1278	379.09	2.58	0.0000000
chrX	584596	586693	2098	824	1187	642.78	3.13	0.0000000
chrX	586847	588072	1226	562	503	50.5	2.06	0.2000000
chrX	597740	598924	1185	630	505	58.74	2.36	0.2100000
chrX	610181	612743	2563	1962	1420	598.48	2.67	0.0000000
chrX	614531	616044	1514	759	786	271.63	2.96	0.0000000
chrX	616768	618741	1974	1220	1068	407.35	2.81	0.0000000
chrX	619800	621180	1381	567	593	70.42	2	0.1500000
chrX	621451	625355	3905	1805	2641	2070.16	3.3	0.0000000
chrX	628145	629599	1455	694	724	202.42	2.58	0.1200000
chrX	637285	641390	4106	3174	2503	1520.96	3.36	0.0000000
chrX	641505	642652	1148	578	470	57.36	2.39	0.2100000
chrX	648060	650152	2093	1633	887	107.41	1.95	0.0900000
chrX	650691	652156	1466	623	636	90.39	2.01	0.1600000
chrX	655293	656632	1340	694	670	223.59	3.18	0.0000000
chrX	658043	659348	1306	523	624	171.87	2.85	0.1100000
chrX	662160	664707	2548	1311	1372	541.34	2.27	0.0000000
chrX	676310	677480	1171	583	500	61.44	2.54	0.1400000
chrX	702938	704444	1507	884	648	65.06	1.96	0.1400000
chrX	716614	718556	1943	1365	906	221.88	2.55	0.0000000
chrX	735081	737311	2231	1658	936	104.44	2.22	0.0900000
chrXI	18252	19503	1252	718	510	83.7	2.27	0.1600000
chrXI	24046	25513	1468	890	667	169.9	2.49	0.1100000
chrXI	30215	32194	1980	500	847	131.36	2.25	0.1000000
chrXI	33660	34997	1338	696	671	216.93	3.02	0.0000000
chrXI	37674	39926	2253	1460	1506	1041.98	3.84	0.0000000
chrXI	49227	50438	1212	616	510	56.89	2.24	0.2100000
chrXI	53163	54348	1186	608	535	91.83	2.84	0.1700000
chrXI	65546	67122	1577	810	662	58.18	1.76	0.2100000
chrXI	67492	71507	4016	3143	2463	1577.7	3.14	0.0000000
chrXI	74201	76543	2343	1634	1276	513.24	3.63	0.0000000
chrXI	79447	81219	1773	1064	1017	548.64	3.78	0.0000000
chrXI	91536	94391	2856	1846	1596	758.21	3.01	0.0000000
chrXI	95758	97091	1334	686	629	153.08	2.66	0.1100000
chrXI	98081	100839	2759	1427	1859	1413.88	3.56	0.0000000
chrXI	117818	119311	1494	954	664	131.38	2.38	0.1000000
chrXI	126527	127909	1383	524	631	139.23	2.32	0.1000000
chrXI	129979	131217	1239	582	541	81.63	2.51	0.1600000
chrXI	132958	134758	1801	1188	830	227.21	2.45	0.0000000
chrXI	141628	144518	2891	1878	1478	555.59	2.47	0.0000000
chrXI	152695	153891	1197	592	509	70.79	2.39	0.1500000
chrXI	154136	156035	1900	1323	814	75.62	1.9	0.1500000
chrXI	162926	167541	4616	3276	3223	2946.14	3.35	0.0000000
chrXI	170489	172472	1984	982	1121	620.74	3.36	0.0000000
chrXI	179061	180996	1936	1456	785	122.12	2.03	0.0900000
chrXI	188141	189308	1168	605	545	150.13	3.22	0.1000000
chrXI	199604	200937	1334	590	651	202.55	3.05	0.1200000
chrXI	201440	203859	2420	1354	1183	250.99	2.55	0.0000000
chrXI	204584	206170	1587	921	807	299.72	3.3	0.0000000
chrXI	209839	211000	1162	562	479	64.66	2.31	0.1400000
chrXI	219526	220930	1405	711	678	197.26	2.67	0.1200000
chrXI	229426	232333	2908	1282	1944	1595.91	3.81	0.0000000
chrXI	232581	234499	1919	1006	858	103.53	1.76	0.0900000
chrXI	245191	247110	1920	651	931	286.62	2.41	0.0000000
chrXI	247205	248919	1715	1119	774	137.46	2.27	0.1000000
chrXI	257805	262343	4539	829	2897	2071.55	3.18	0.0000000
chrXI	268889	271340	2452	612	1113	254.86	3.15	0.0000000
chrXI	277236	280979	3744	716	1964	901.7	2.48	0.0000000
chrXI	284303	285449	1147	578	465	52.43	2.22	0.2000000
chrXI	298494	299864	1371	809	620	102.95	2.29	0.0900000
chrXI	306615	310523	3909	2259	2099	777.65	3.3	0.0000000
chrXI	314070	315932	1863	580	731	72.76	2.16	0.1500000
chrXI	316008	318148	2141	1230	1284	757.49	3.29	0.0000000
chrXI	321130	323653	2524	907	1968	2314.26	3.66	0.0000000
chrXI	325231	330705	5475	1774	3603	2136.52	3.29	0.0000000
chrXI	333451	334657	1207	523	542	113.02	2.83	0.0900000
chrXI	338438	341894	3457	2516	2020	1187.04	3.42	0.0000000
chrXI	354506	356992	2487	1420	1363	673.24	2.54	0.0000000
chrXI	361474	362844	1371	433	535	57.51	1.92	0.2100000
chrXI	364175	365866	1692	1033	775	189.66	2.36	0.1200000
chrXI	368580	372275	3696	973	2379	1522.76	3.08	0.0000000
chrXI	380949	383859	2911	1118	1733	1212.96	4	0.0000000
chrXI	384663	386306	1644	1098	738	169.2	3.03	0.1100000
chrXI	388948	390763	1816	1118	855	167.27	2.5	0.1100000
chrXI	391576	394385	2810	658	1513	779.2	4.14	0.0000000
chrXI	401395	403050	1656	696	991	638.54	3.42	0.0000000
chrXI	407553	408846	1294	526	571	108.46	2.33	0.0900000
chrXI	417296	418778	1483	687	1030	894.68	4.79	0.0000000
chrXI	428399	429946	1548	874	771	249.21	2.68	0.0000000
chrXI	434200	435747	1548	818	866	401.38	3.43	0.0000000
chrXI	436857	438296	1440	771	816	358.09	3.27	0.0000000
chrXI	438916	440347	1432	619	696	186.27	2.46	0.1200000
chrXI	442175	443599	1425	581	722	219.97	2.75	0.0000000
chrXI	444575	445969	1395	666	648	123.58	2.38	0.1000000
chrXI	450759	452803	2045	1475	1151	518.99	3.3	0.0000000
chrXI	454109	455711	1603	746	790	151.75	2.29	0.1100000
chrXI	462188	464258	2071	628	1133	436.96	2.89	0.0000000
chrXI	465621	466885	1265	642	600	125.44	2.91	0.1000000
chrXI	472871	474137	1267	572	556	87.5	2.41	0.1600000
chrXI	475348	476654	1307	637	575	95.27	2.35	0.1700000
chrXI	493183	494372	1190	604	481	68.63	2.14	0.1500000
chrXI	505754	507247	1494	687	908	566.22	3.97	0.0000000
chrXI	507411	508634	1224	535	524	67.28	2.61	0.1500000
chrXI	512544	519668	7125	6101	4926	2780.36	3.87	0.0000000
chrXI	524298	525790	1493	751	678	122.1	2.14	0.0900000
chrXI	526033	528082	2050	593	1053	262.91	2.41	0.0000000
chrXI	533100	534437	1338	713	603	117.86	2.48	0.0900000
chrXI	552041	553211	1171	619	480	68.46	2.41	0.1500000
chrXI	559026	560154	1129	556	484	101.18	3	0.0900000
chrXI	565197	566679	1483	695	813	471.14	3.7	0.0000000
chrXI	566703	568479	1777	1127	913	432.31	3.26	0.0000000
chrXI	577699	582261	4563	1295	2542	1272.94	2.82	0.0000000
chrXI	598387	600127	1741	518	704	74.58	2.09	0.1500000
chrXI	607868	608995	1128	598	470	70.74	2.54	0.1500000
chrXI	613670	616232	2563	1611	1669	1350.1	3.63	0.0000000
chrXI	625310	626986	1677	1187	677	68.29	2.11	0.1500000
chrXI	634657	635813	1157	612	522	138.29	3.16	0.1000000
chrXI	639730	640973	1244	563	547	137.67	2.82	0.1000000
chrXII	1	11845	11845	9174	9509	308.37	3.67	0.0000000
chrXII	21560	23858	2299	1774	873	80.83	1.67	0.1600000
chrXII	28625	30327	1703	1192	718	125.24	2.31	0.1000000
chrXII	39751	41096	1346	656	697	314.34	3.48	0.0000000
chrXII	48777	50289	1513	901	741	235.57	2.71	0.0000000
chrXII	63067	67230	4164	623	2292	1135.01	3.61	0.0000000
chrXII	82852	84923	2072	1440	1135	486.74	2.76	0.0000000
chrXII	86538	91916	5379	3944	3510	1508.59	2.48	0.0000000
chrXII	94027	99506	5480	3010	3564	1574.38	3.21	0.0000000
chrXII	107683	109932	2250	825	1333	822.04	2.92	0.0000000
chrXII	111084	112343	1260	530	542	65.68	2.16	0.1400000
chrXII	130091	131970	1880	744	1043	527.06	3.59	0.0000000
chrXII	147061	148422	1362	581	649	136.26	2.39	0.1000000
chrXII	150090	151852	1763	508	741	90.16	1.81	0.1600000
chrXII	162760	164733	1974	792	1017	307.35	2.5	0.0000000
chrXII	167491	169576	2086	1393	842	97.71	2.85	0.1700000
chrXII	179136	180556	1421	901	587	78.15	2.24	0.1500000
chrXII	186833	188603	1771	925	1111	849.68	3.6	0.0000000
chrXII	196127	200010	3884	1926	1880	462.25	2.26	0.0000000
chrXII	200913	202843	1931	702	765	117.84	2.26	0.0900000
chrXII	214300	216466	2167	985	1035	55.38	2.23	0.2000000
chrXII	217397	221354	3958	2620	2708	774.51	2.93	0.0000000
chrXII	223649	225835	2187	1731	898	83.44	1.83	0.1600000
chrXII	230337	235640	5304	4073	4328	3100	3.78	0.0000000
chrXII	259387	261590	2204	1581	1087	395.89	3.35	0.0000000
chrXII	273292	274629	1338	565	592	136.78	2.49	0.1000000
chrXII	278133	279359	1227	585	524	99.16	2.41	0.0900000
chrXII	286102	287322	1221	675	515	74.08	2.3	0.1500000
chrXII	319640	321180	1541	773	722	220.86	2.46	0.0000000
chrXII	321771	323648	1878	1217	799	141.12	2.15	0.1000000
chrXII	326866	328455	1590	918	773	241.88	2.62	0.0000000
chrXII	328591	330133	1543	733	703	122.86	2.19	0.1000000
chrXII	331520	333071	1552	908	1029	852.37	4.35	0.0000000
chrXII	336759	337929	1171	610	492	59.65	2.36	0.1400000
chrXII	340501	342405	1905	725	1290	985.82	4.19	0.0000000
chrXII	367767	372292	4526	1989	3970	3100	3.92	0.0000000
chrXII	383923	386105	2183	575	1046	180.97	3.02	0.1100000
chrXII	387406	392229	4824	1200	2797	1295.11	3.18	0.0000000
chrXII	409823	411012	1190	601	511	55.19	2.35	0.2000000
chrXII	416419	418768	2350	598	1280	533.29	2.95	0.0000000
chrXII	422883	425639	2757	1834	2063	2240.01	3.84	0.0000000
chrXII	439292	440798	1507	919	721	186.51	2.32	0.1200000
chrXII	444373	445908	1536	706	792	290.06	2.86	0.0000000
chrXII	447100	450381	3282	2304	1824	338.29	2.53	0.0000000
chrXII	492771	494162	1392	499	608	60.48	2.07	0.1400000
chrXII	497570	499146	1577	572	648	58.94	2.06	0.1400000
chrXII	500064	501702	1639	995	763	135.6	2.2	0.1000000
chrXII	509794	512583	2790	690	1661	900.21	2.89	0.0000000
chrXII	512616	515336	2721	1708	1598	831.07	2.72	0.0000000
chrXII	533773	535043	1271	637	651	230.29	3.48	0.0000000
chrXII	540230	542594	2365	1587	1367	783.35	2.91	0.0000000
chrXII	551198	555155	3958	797	2863	2867.78	4.81	0.0000000
chrXII	558852	560185	1334	619	759	373.24	3.78	0.0000000
chrXII	565987	567438	1452	716	718	241.7	2.81	0.0000000
chrXII	572932	574468	1537	807	698	129.21	2.19	0.1000000
chrXII	592913	595800	2888	1054	2077	748.54	2.96	0.0000000
chrXII	602147	606264	4118	3245	2564	1440.75	3.09	0.0000000
chrXII	611038	612586	1549	925	768	197.76	2.85	0.1200000
chrXII	626126	627736	1611	978	756	170.4	2.23	0.1100000
chrXII	632774	634652	1879	686	1154	759.57	4.01	0.0000000
chrXII	635570	636959	1390	739	733	289.34	3.4	0.0000000
chrXII	639565	641793	2229	611	964	137.89	2.31	0.1000000
chrXII	644450	647005	2556	1284	1844	1822.55	3.83	0.0000000
chrXII	664669	666220	1552	1052	662	73.5	2.13	0.1500000
chrXII	668519	670383	1865	1211	1000	458.57	2.64	0.0000000
chrXII	677181	678404	1224	729	520	66.46	2.19	0.1400000
chrXII	679688	681767	2080	1403	919	159.43	2.65	0.1100000
chrXII	703702	705639	1938	633	1141	749.97	3.97	0.0000000
chrXII	719280	720994	1715	1066	724	91.74	2.4	0.1700000
chrXII	721298	724449	3152	2329	1707	746.42	2.83	0.0000000
chrXII	724917	726625	1709	873	841	214.86	2.34	0.1300000
chrXII	727448	729250	1803	1133	918	295.33	2.37	0.0000000
chrXII	731458	732862	1405	684	646	93.02	2.26	0.1700000
chrXII	737055	738418	1364	701	633	124.45	2.67	0.1000000
chrXII	756518	757744	1227	601	568	118.45	2.85	0.0900000
chrXII	758365	759900	1536	733	712	149.09	2.4	0.1000000
chrXII	763655	765395	1741	1029	814	189.79	2.22	0.1200000
chrXII	781077	785211	4135	2623	2401	1194.7	2.77	0.0000000
chrXII	789292	790733	1442	817	722	217.37	2.87	0.0000000
chrXII	795872	797863	1992	663	1025	290.09	2.47	0.0000000
chrXII	804481	806078	1598	640	741	135.28	2.26	0.1000000
chrXII	808276	809946	1671	739	944	459.1	2.77	0.0000000
chrXII	818211	819618	1408	667	573	64.73	1.81	0.1400000
chrXII	819749	821019	1271	717	572	104.46	2.61	0.0900000
chrXII	822364	823504	1141	642	479	76.79	2.7	0.1500000
chrXII	825925	829297	3373	2588	2123	1517.28	3.15	0.0000000
chrXII	829865	831427	1563	829	695	148.9	2.11	0.1000000
chrXII	837059	841797	4739	675	2640	1527.22	2.78	0.0000000
chrXII	861600	863136	1537	657	987	880.15	4.21	0.0000000
chrXII	870772	872321	1550	598	837	426.59	3.53	0.0000000
chrXII	873270	874396	1127	589	469	71.99	2.66	0.1500000
chrXII	874614	875976	1363	574	649	174.42	2.55	0.1100000
chrXII	876749	878732	1984	1238	1299	1093.17	3.71	0.0000000
chrXII	897335	899714	2380	1677	1043	194.42	2.28	0.1200000
chrXII	902163	904127	1965	697	1081	544.49	2.84	0.0000000
chrXII	906015	907363	1349	514	545	59.09	1.81	0.1400000
chrXII	909147	910731	1585	913	734	196.71	2.66	0.1200000
chrXII	920973	922659	1687	999	875	347.79	2.75	0.0000000
chrXII	924280	925658	1379	674	922	839.44	5.11	0.0000000
chrXII	931448	933171	1724	590	864	288.57	2.32	0.0000000
chrXII	940825	944353	3529	1181	2016	348.31	2.11	0.0000000
chrXII	949122	951326	2205	971	1326	753.47	2.94	0.0000000
chrXII	953862	955927	2066	895	1271	939.01	3.54	0.0000000
chrXII	965008	966302	1295	588	602	180.79	2.62	0.1100000
chrXII	978659	982054	3396	1717	1966	171.03	1.85	0.1100000
chrXII	986457	988822	2366	699	1201	453.84	2.96	0.0000000
chrXII	990156	991413	1258	583	581	144.15	2.77	0.1000000
chrXII	1010242	1015155	4914	4164	3036	2124.64	3.53	0.0000000
chrXII	1027302	1029186	1885	588	1053	529.88	3.38	0.0000000
chrXII	1031934	1033161	1228	572	594	195.45	3.48	0.1200000
chrXII	1042673	1044454	1782	1197	922	449.73	3.28	0.0000000
chrXIII	1	5938	5938	3408	4712	2479.37	3.26	0.0000000
chrXIII	12628	17775	5148	2134	3464	2646.82	4.38	0.0000000
chrXIII	27947	30421	2475	1340	1069	69.06	1.71	0.1500000
chrXIII	33220	34661	1442	644	696	166.98	2.39	0.1100000
chrXIII	43007	44172	1166	581	521	94.3	2.74	0.1700000
chrXIII	67082	68574	1493	469	627	88.14	1.96	0.1600000
chrXIII	69218	72862	3645	1133	2428	2088.72	3.19	0.0000000
chrXIII	90680	92357	1678	489	689	92.92	2.06	0.1700000
chrXIII	96996	98251	1256	691	542	99.59	2.32	0.0900000
chrXIII	103655	105217	1563	999	721	172.5	2.37	0.1100000
chrXIII	118556	120325	1770	973	1045	571.92	3.02	0.0000000
chrXIII	128981	130310	1330	611	636	158.85	2.69	0.1100000
chrXIII	165863	169269	3407	1701	1901	663.06	2.44	0.0000000
chrXIII	169403	170893	1491	726	737	216.2	2.62	0.1300000
chrXIII	177570	179074	1505	775	809	251.19	2.93	0.0000000
chrXIII	183567	190372	6806	1519	4187	570.53	3.01	0.0000000
chrXIII	195295	202559	7265	1925	4652	735.6	2.96	0.0000000
chrXIII	203641	204835	1195	605	569	72.82	2.75	0.1500000
chrXIII	208117	209676	1560	549	671	92.97	1.9	0.1700000
chrXIII	215751	217663	1913	590	805	138.59	2.74	0.1000000
chrXIII	219297	221492	2196	1635	1161	444.95	2.22	0.0000000
chrXIII	224837	226137	1301	517	556	85.68	2.34	0.1600000
chrXIII	235980	237144	1165	590	513	122.69	3	0.1000000
chrXIII	243614	244809	1196	541	521	69.15	2.54	0.1500000
chrXIII	245403	246659	1257	656	542	69.97	2.28	0.1500000
chrXIII	247076	248222	1147	592	487	57.82	2.55	0.2100000
chrXIII	250870	252348	1479	708	777	288.99	2.93	0.0000000
chrXIII	252601	254234	1634	646	895	372.5	2.97	0.0000000
chrXIII	258220	259704	1485	659	873	415.81	3.42	0.0000000
chrXIII	262146	263838	1693	760	751	73.98	1.86	0.1500000
chrXIII	266443	268221	1779	628	847	187.32	2.41	0.1200000
chrXIII	271249	273366	2118	645	970	118.77	2.27	0.0900000
chrXIII	281871	285182	3312	1219	1970	912.54	3.5	0.0000000
chrXIII	286451	290337	3887	1967	2718	1659.92	2.66	0.0000000
chrXIII	302232	303575	1344	584	613	93.39	2.35	0.1700000
chrXIII	305352	307460	2109	693	1331	892.15	3.4	0.0000000
chrXIII	317900	319375	1476	750	869	481.29	3.77	0.0000000
chrXIII	321311	322493	1183	567	523	87.91	2.72	0.1600000
chrXIII	329733	331050	1318	521	552	70.11	2.18	0.1500000
chrXIII	334254	335469	1216	669	544	107.99	2.77	0.0900000
chrXIII	340405	341632	1228	620	528	78.5	2.33	0.1600000
chrXIII	343074	344302	1229	484	491	57.98	1.94	0.2100000
chrXIII	346461	348937	2477	810	1347	566.64	2.86	0.0000000
chrXIII	349177	350813	1637	723	878	432.69	2.86	0.0000000
chrXIII	351863	354247	2385	1260	1722	1756.49	4.14	0.0000000
chrXIII	359839	363637	3799	2542	2338	952.38	2.62	0.0000000
chrXIII	373738	380020	6283	3852	4224	1132.77	2.83	0.0000000
chrXIII	387221	389174	1954	929	1256	1005.91	3.46	0.0000000
chrXIII	392058	393265	1208	641	545	121.96	2.71	0.0900000
chrXIII	407649	409326	1678	575	775	173.96	2.05	0.1100000
chrXIII	410906	412089	1184	589	481	75.09	2.26	0.1500000
chrXIII	412463	414433	1971	976	1075	622.39	3.1	0.0000000
chrXIII	429148	432577	3430	2353	1964	1070.59	2.75	0.0000000
chrXIII	432972	435264	2293	893	1633	1625.75	3.83	0.0000000
chrXIII	435565	436909	1345	824	577	88.47	2.26	0.1600000
chrXIII	438559	439779	1221	566	516	72.57	2.27	0.1500000
chrXIII	464351	466456	2106	1557	844	156.23	2.38	0.1100000
chrXIII	472069	474093	2025	1020	1307	1078.14	3.44	0.0000000
chrXIII	474956	479455	4500	3031	2840	2161.98	3.78	0.0000000
chrXIII	481831	483795	1965	618	863	210.97	2.49	0.1200000
chrXIII	485876	487172	1297	705	580	117.84	2.47	0.0900000
chrXIII	504439	505657	1219	534	575	112.91	3.02	0.0900000
chrXIII	509183	512282	3100	1532	1832	947.2	3.53	0.0000000
chrXIII	512286	514703	2418	1885	992	102.78	1.91	0.0900000
chrXIII	536758	538211	1454	780	670	140.59	2.26	0.1000000
chrXIII	539272	541546	2275	933	1340	762.82	3.05	0.0000000
chrXIII	545349	546564	1216	569	547	109.96	2.79	0.0900000
chrXIII	550923	552361	1439	830	664	134.73	2.45	0.1000000
chrXIII	556080	557826	1747	818	980	490.38	3.35	0.0000000
chrXIII	559632	561500	1869	1069	977	392.51	3.19	0.0000000
chrXIII	571553	572784	1232	608	561	112.4	2.68	0.0900000
chrXIII	574366	575636	1271	695	551	89.7	2.53	0.1600000
chrXIII	577007	578274	1268	685	577	152.48	2.64	0.1100000
chrXIII	589210	590884	1675	922	855	342.69	2.72	0.0000000
chrXIII	592164	593563	1400	664	670	174.44	2.64	0.1100000
chrXIII	598712	601938	3227	2398	1674	499.75	2.59	0.0000000
chrXIII	607903	611977	4075	550	1837	401.18	2.36	0.0000000
chrXIII	617888	619082	1195	564	530	97.32	2.77	0.1700000
chrXIII	621894	625027	3134	597	1700	726.75	2.9	0.0000000
chrXIII	625033	629147	4115	2899	1950	450.41	2.47	0.0000000
chrXIII	636461	637617	1157	622	510	74.6	2.86	0.1500000
chrXIII	651605	656974	5370	1694	3503	2794.19	3.78	0.0000000
chrXIII	661185	662833	1649	882	922	446.22	2.98	0.0000000
chrXIII	664102	665253	1152	529	490	67.1	2.73	0.1500000
chrXIII	674477	677309	2833	1036	1675	1109.15	3.86	0.0000000
chrXIII	714879	716727	1849	525	757	109.25	2.17	0.0900000
chrXIII	742175	744316	2142	1546	1232	715.38	3.78	0.0000000
chrXIII	750811	752267	1457	759	634	114.2	2.14	0.0900000
chrXIII	758288	760793	2506	827	1406	773	3.22	0.0000000
chrXIII	762561	763765	1205	584	516	74.4	2.36	0.1500000
chrXIII	769908	772863	2956	759	1361	283.22	2.42	0.0000000
chrXIII	772962	776315	3354	1896	2205	1923.22	3.41	0.0000000
chrXIII	776758	778499	1742	1182	749	139.15	2.01	0.1000000
chrXIII	783826	785076	1251	677	540	97.03	2.45	0.1700000
chrXIII	792756	794291	1536	857	852	339.01	3.59	0.0000000
chrXIII	797357	798909	1553	850	819	305.74	2.75	0.0000000
chrXIII	807233	809295	2063	925	919	132.43	2.35	0.1000000
chrXIII	817942	820596	2655	728	1280	351.42	2.99	0.0000000
chrXIII	830836	833539	2704	1625	1197	182.08	1.98	0.1200000
chrXIII	841166	842593	1428	774	829	485.08	3.7	0.0000000
chrXIII	851410	853081	1672	991	903	460.79	2.78	0.0000000
chrXIII	853824	855307	1484	900	614	94.37	2.13	0.1700000
chrXIII	859948	862599	2652	1616	1320	450.7	2.57	0.0000000
chrXIII	863037	864361	1325	754	591	120.01	2.38	0.0900000
chrXIII	872028	873258	1231	609	555	113.33	2.72	0.0900000
chrXIII	873623	875411	1789	1227	764	109.97	2.52	0.0900000
chrXIII	885942	887180	1239	601	548	95.64	2.5	0.1700000
chrXIII	897012	898206	1195	579	532	93.78	2.84	0.1700000
chrXIII	900765	906222	5458	3617	3124	1550.65	3.39	0.0000000
chrXIII	914366	916128	1763	1037	843	304.33	3.1	0.0000000
chrXIV	1	7199	7199	3588	5622	2194.75	3.16	0.0000000
chrXIV	18652	19976	1325	608	736	438.16	3.9	0.0000000
chrXIV	22129	24211	2083	1322	1207	812.88	2.94	0.0000000
chrXIV	31124	32398	1275	563	574	161.48	2.86	0.1100000
chrXIV	33509	35459	1951	1233	1321	1353.05	4.52	0.0000000
chrXIV	36981	38163	1183	596	501	93.29	2.57	0.1700000
chrXIV	51242	53118	1877	1228	818	153.08	2.11	0.1100000
chrXIV	57105	58837	1733	552	1101	822.4	3.51	0.0000000
chrXIV	58969	60705	1737	897	785	163.36	2.05	0.1100000
chrXIV	75977	77311	1335	590	665	199.45	3.01	0.1200000
chrXIV	79749	81202	1454	722	767	295.01	3.27	0.0000000
chrXIV	88471	90858	2388	1667	1315	600.55	3.61	0.0000000
chrXIV	91216	92397	1182	587	525	75.84	2.66	0.1500000
chrXIV	95716	97294	1579	489	660	50.11	1.9	0.2000000
chrXIV	99139	101066	1928	1365	952	52.62	1.72	0.2000000
chrXIV	101407	102772	1366	768	649	173.16	2.96	0.1100000
chrXIV	103477	104715	1239	641	534	72.48	2.32	0.1500000
chrXIV	106918	108984	2067	759	909	179.73	2.08	0.1100000
chrXIV	112259	113534	1276	595	576	137.25	2.59	0.1000000
chrXIV	118351	119653	1303	715	519	55.06	1.97	0.2000000
chrXIV	137451	139029	1579	705	784	307.19	2.54	0.0000000
chrXIV	157232	158414	1183	663	461	53.47	2.21	0.2000000
chrXIV	167388	168633	1246	659	565	97.48	2.58	0.1700000
chrXIV	174056	175406	1351	767	569	68.7	1.99	0.1500000
chrXIV	186607	188650	2044	1475	933	232.8	2.26	0.0000000
chrXIV	196799	199364	2566	1488	1579	1162.01	3.08	0.0000000
chrXIV	199678	200902	1225	627	529	94.7	2.28	0.1700000
chrXIV	216935	218392	1458	795	709	276.56	2.7	0.0000000
chrXIV	226692	227999	1308	710	636	205.97	3.01	0.1200000
chrXIV	228447	229775	1329	708	645	223.45	2.94	0.0000000
chrXIV	233383	234663	1281	638	623	221.23	3.23	0.0000000
chrXIV	239429	240690	1262	628	602	178.55	3.07	0.1100000
chrXIV	246627	248005	1379	805	656	179.37	2.52	0.1100000
chrXIV	253571	255096	1526	668	740	227.78	2.64	0.0000000
chrXIV	269403	270807	1405	590	740	292.76	3.1	0.0000000
chrXIV	272498	274928	2431	1597	1414	798.75	3.2	0.0000000
chrXIV	275210	276830	1621	730	949	548.52	3.36	0.0000000
chrXIV	280959	282541	1583	935	751	202.65	2.48	0.1200000
chrXIV	283435	284615	1181	655	531	115.62	2.89	0.0900000
chrXIV	295169	296458	1290	592	608	119.4	2.71	0.0900000
chrXIV	300503	302956	2454	1737	1519	1046.15	3.45	0.0000000
chrXIV	308414	310809	2396	1762	1003	116.1	2.09	0.0900000
chrXIV	317319	319557	2239	1726	1001	149.88	2.16	0.1000000
chrXIV	321072	322248	1177	566	546	110.78	3.15	0.0900000
chrXIV	330686	332913	2228	1638	983	151.22	2.35	0.1100000
chrXIV	334444	338431	3988	1289	2188	969.65	3.3	0.0000000
chrXIV	338615	340876	2262	746	1442	1007.46	3.92	0.0000000
chrXIV	341532	342983	1452	845	695	158.46	2.66	0.1100000
chrXIV	345030	346771	1742	1170	818	173.33	2.16	0.1100000
chrXIV	349325	351399	2075	1452	1181	616.18	2.73	0.0000000
chrXIV	353869	357490	3622	1506	2280	1779.7	3.89	0.0000000
chrXIV	365317	367401	2085	1419	1159	621.1	3.16	0.0000000
chrXIV	369600	370892	1293	555	621	170	2.82	0.1100000
chrXIV	371426	375471	4046	2471	2015	830.21	2.94	0.0000000
chrXIV	378185	379347	1163	653	499	83.41	2.62	0.1600000
chrXIV	399989	401107	1119	581	459	66.85	2.68	0.1400000
chrXIV	405013	406319	1307	639	613	179.63	2.98	0.1100000
chrXIV	407343	408712	1370	658	631	165.54	2.62	0.1100000
chrXIV	411537	413211	1675	478	722	114.04	2.31	0.0900000
chrXIV	424042	425471	1430	559	633	129.7	2.42	0.1000000
chrXIV	426458	428155	1698	1139	946	508.25	2.72	0.0000000
chrXIV	436927	438216	1290	623	572	110.8	2.28	0.0900000
chrXIV	438943	443596	4654	2068	2650	1438.71	3.32	0.0000000
chrXIV	446723	447847	1125	595	458	52.27	2.36	0.2000000
chrXIV	450130	452749	2620	536	1050	139.33	2.23	0.1000000
chrXIV	466112	467383	1272	757	537	89.4	2.37	0.1600000
chrXIV	470582	471955	1374	783	721	315.65	3.13	0.0000000
chrXIV	475995	477133	1139	651	488	98.9	2.93	0.0900000
chrXIV	477687	479814	2128	611	1020	312.43	2.34	0.0000000
chrXIV	480166	481646	1481	513	661	116.26	2.03	0.0900000
chrXIV	482624	483906	1283	632	592	166.95	2.87	0.1100000
chrXIV	487658	488982	1325	717	608	155.57	2.62	0.1100000
chrXIV	490612	492236	1625	745	889	382.55	2.98	0.0000000
chrXIV	492694	493845	1152	566	477	59.5	2.55	0.1400000
chrXIV	499785	501317	1533	943	745	238.86	2.35	0.0000000
chrXIV	502582	503830	1249	666	527	86.32	2.1	0.1600000
chrXIV	517794	522498	4705	2554	2986	1102.82	2.92	0.0000000
chrXIV	523921	526469	2549	1831	1421	402.27	2.59	0.0000000
chrXIV	530798	532684	1887	958	1058	422.52	2.93	0.0000000
chrXIV	541389	543771	2383	1369	1270	429.59	2.4	0.0000000
chrXIV	544413	548517	4105	3135	2487	1210.48	3.74	0.0000000
chrXIV	554489	555613	1125	551	493	60.18	3.03	0.1400000
chrXIV	558250	561223	2974	1645	1686	563.41	2.21	0.0000000
chrXIV	561742	564752	3011	553	1397	80.04	2.19	0.1600000
chrXIV	564852	568814	3963	2616	2404	591.35	2.2	0.0000000
chrXIV	574878	577543	2666	1455	1696	1046.5	3.31	0.0000000
chrXIV	578326	580019	1694	765	960	488.66	3.25	0.0000000
chrXIV	584952	588388	3437	1950	1538	311.5	2.6	0.0000000
chrXIV	601888	603230	1343	588	653	158.94	2.85	0.1100000
chrXIV	604372	605775	1404	666	679	175.81	2.83	0.1100000
chrXIV	617826	620619	2794	2223	1377	348.25	2.4	0.0000000
chrXIV	623463	626548	3086	2537	1325	164.41	2.21	0.1100000
chrXIV	628668	634640	5973	2867	3332	1527.73	3.31	0.0000000
chrXIV	651603	653552	1950	555	969	288.81	2.23	0.0000000
chrXIV	661354	665897	4544	697	2344	964.7	3.15	0.0000000
chrXIV	667676	668895	1220	452	502	78.02	2.21	0.1500000
chrXIV	685087	686585	1499	779	973	753.68	4.28	0.0000000
chrXIV	686944	688117	1174	571	474	59.96	2.22	0.1400000
chrXIV	691186	693361	2176	1063	1330	1012.94	3.76	0.0000000
chrXIV	693477	695989	2513	1832	1559	1176.72	3.56	0.0000000
chrXIV	707048	709225	2178	1468	1235	721.05	4.63	0.0000000
chrXIV	715528	716736	1209	676	476	51.53	2.07	0.2000000
chrXIV	725849	727275	1427	974	608	56.27	2.13	0.2100000
chrXIV	736004	737205	1202	561	492	73.68	2.32	0.1500000
chrXIV	738701	739958	1258	637	539	103.67	2.23	0.0900000
chrXIV	779180	780329	1150	549	459	54.32	2.17	0.2000000
chrXV	20946	22456	1511	972	617	61.31	2.23	0.1400000
chrXV	26889	29495	2607	1260	1314	291.12	2.22	0.0000000
chrXV	38122	39333	1212	621	481	53.68	1.99	0.2000000
chrXV	44351	45564	1214	605	629	303.62	4.11	0.0000000
chrXV	47036	48178	1143	553	477	65.3	2.66	0.1400000
chrXV	60514	61714	1201	594	522	82.47	2.53	0.1600000
chrXV	69561	70896	1336	720	642	181.35	2.87	0.1200000
chrXV	73052	74463	1412	574	646	143.53	2.26	0.1000000
chrXV	76915	78289	1375	645	731	310.06	3.54	0.0000000
chrXV	82434	84120	1687	831	1035	699.02	3.79	0.0000000
chrXV	95945	97941	1997	1525	903	144.69	2.1	0.1000000
chrXV	103280	104711	1432	825	703	161.56	2.52	0.1100000
chrXV	108124	112626	4503	1186	2956	1917.28	3.03	0.0000000
chrXV	117379	124197	6819	1160	4417	573.69	2.96	0.0000000
chrXV	127632	129582	1951	1393	844	109.14	2.38	0.0900000
chrXV	154203	155308	1106	582	463	50.25	2.75	0.2000000
chrXV	158326	162611	4286	1826	4046	3100	3.82	0.0000000
chrXV	167299	169430	2132	1400	1397	959.99	3.54	0.0000000
chrXV	169530	171558	2029	780	1339	972.56	3.67	0.0000000
chrXV	184606	185962	1357	771	637	150.72	2.83	0.1100000
chrXV	194179	195390	1212	523	542	108.72	2.86	0.0900000
chrXV	196014	197219	1206	501	496	61.21	2.23	0.1400000
chrXV	201228	203061	1834	554	838	135.75	2.63	0.1000000
chrXV	211364	212811	1448	820	838	463.72	3.57	0.0000000
chrXV	215524	219317	3794	1213	2354	1516.48	3.9	0.0000000
chrXV	230786	232836	2051	1213	1158	554.11	3.18	0.0000000
chrXV	233329	235291	1963	994	1023	300.16	2.22	0.0000000
chrXV	237932	239281	1350	691	745	338.74	3.49	0.0000000
chrXV	240611	242148	1538	734	740	196.67	2.54	0.1200000
chrXV	253251	256888	3638	2052	1821	621.42	2.51	0.0000000
chrXV	267069	268465	1397	723	633	97.47	2.14	0.1700000
chrXV	273262	275313	2052	1470	1201	469.96	2.51	0.0000000
chrXV	285171	286579	1409	687	681	156.69	2.68	0.1100000
chrXV	287718	289196	1479	788	834	394.18	3.18	0.0000000
chrXV	294586	297220	2635	1781	1399	550.38	3.31	0.0000000
chrXV	302578	305670	3093	640	1939	1396.16	3.18	0.0000000
chrXV	315072	317319	2248	1113	1187	467.47	2.58	0.0000000
chrXV	323925	325293	1369	747	621	131.45	2.29	0.1000000
chrXV	328744	330004	1261	643	555	76.57	2.31	0.1500000
chrXV	338134	340753	2620	753	1168	166.4	1.91	0.1100000
chrXV	342059	344393	2335	762	1240	423.19	2.64	0.0000000
chrXV	356626	358047	1422	789	725	265.11	2.8	0.0000000
chrXV	363312	364826	1515	860	666	116.29	2.14	0.0900000
chrXV	366050	368411	2362	1747	994	155.8	2.54	0.1100000
chrXV	370202	372221	2020	1407	1156	662.42	2.84	0.0000000
chrXV	377279	378390	1112	520	451	50.9	2.51	0.2000000
chrXV	379277	381685	2409	1159	1075	198.91	1.96	0.1200000
chrXV	382090	387261	5172	3063	2502	965.56	3.08	0.0000000
chrXV	388608	389980	1373	759	589	115.65	2.16	0.0900000
chrXV	390774	392769	1996	1118	1097	620.5	2.72	0.0000000
chrXV	396899	398101	1203	636	515	92.52	2.52	0.1700000
chrXV	399508	402037	2530	648	1250	477.82	3.14	0.0000000
chrXV	404925	406151	1227	571	506	58.04	2.21	0.2100000
chrXV	407356	408966	1611	1007	791	239.96	2.66	0.0000000
chrXV	411755	413186	1432	806	619	100.38	2.08	0.0900000
chrXV	413289	414458	1170	595	518	99.95	2.74	0.0900000
chrXV	417479	418922	1444	707	784	365.98	3.25	0.0000000
chrXV	423639	425084	1446	773	729	222.35	2.75	0.0000000
chrXV	425824	428253	2430	1739	1495	859.33	3.32	0.0000000
chrXV	439827	441849	2023	1346	877	107.68	2.44	0.0900000
chrXV	442590	444857	2268	1483	1383	858.33	3.18	0.0000000
chrXV	446290	447668	1379	742	632	108.35	2.36	0.0900000
chrXV	457443	458770	1328	642	625	142.81	2.75	0.1000000
chrXV	461207	463486	2280	1643	1250	587.94	2.85	0.0000000
chrXV	478758	480733	1976	729	1071	475	2.5	0.0000000
chrXV	481230	482630	1401	792	798	379.77	3.72	0.0000000
chrXV	486336	488172	1837	621	1016	409.46	3.06	0.0000000
chrXV	493679	495542	1864	1021	1152	803.81	3.59	0.0000000
chrXV	504198	506097	1900	1371	813	130.57	2.14	0.1000000
chrXV	507196	508435	1240	584	499	54.86	1.91	0.2000000
chrXV	510758	512324	1567	873	789	271.21	3.14	0.0000000
chrXV	519880	521733	1854	754	893	289.07	2.6	0.0000000
chrXV	524561	525694	1134	561	464	70.88	2.42	0.1500000
chrXV	533421	534658	1238	599	615	234.08	3.48	0.0000000
chrXV	544422	545562	1141	554	485	81.35	2.91	0.1600000
chrXV	549942	551475	1534	958	668	133.05	2.22	0.1000000
chrXV	551490	553759	2270	1475	1110	349.57	2.69	0.0000000
chrXV	554075	555165	1091	558	443	57.91	2.75	0.2100000
chrXV	572439	573771	1333	631	603	113.4	2.51	0.0900000
chrXV	574233	575596	1364	564	639	141.74	2.45	0.1000000
chrXV	579178	580555	1378	765	692	228.95	3.07	0.0000000
chrXV	583630	585115	1486	870	658	152.91	2.27	0.1100000
chrXV	585701	586999	1299	725	593	151.63	2.69	0.1100000
chrXV	592096	593348	1253	567	546	52.49	2.31	0.2000000
chrXV	593884	599617	5734	1626	3520	729.22	3	0.0000000
chrXV	605942	607115	1174	659	469	52.17	2.14	0.2000000
chrXV	611316	612655	1340	718	647	207.14	2.9	0.1200000
chrXV	616235	617694	1460	663	870	579.02	4.11	0.0000000
chrXV	617922	620017	2096	1397	1166	620.24	2.9	0.0000000
chrXV	627372	628663	1292	576	560	119.77	2.39	0.0900000
chrXV	631035	632665	1631	722	1046	913.06	4.18	0.0000000
chrXV	638224	640031	1808	774	954	451.08	2.97	0.0000000
chrXV	641860	643356	1497	866	721	219.12	2.94	0.0000000
chrXV	648293	649584	1292	650	567	122.38	2.62	0.0900000
chrXV	653454	654799	1346	682	638	155.09	2.59	0.1100000
chrXV	656401	657758	1358	656	581	71.08	2.06	0.1500000
chrXV	661189	663172	1984	1027	1072	503.95	2.7	0.0000000
chrXV	669903	671743	1841	1036	994	548.95	3.3	0.0000000
chrXV	675271	676416	1146	604	453	57.15	2.28	0.2100000
chrXV	678508	679626	1119	584	441	50.79	2.26	0.2000000
chrXV	681617	684465	2849	783	1727	1177.4	3.53	0.0000000
chrXV	706925	710547	3623	2573	2105	520.69	2.32	0.0000000
chrXV	711828	713257	1430	730	1009	918.36	5.17	0.0000000
chrXV	716306	717740	1435	782	730	337.96	3.26	0.0000000
chrXV	721371	723064	1694	363	621	52.12	1.69	0.2000000
chrXV	733162	734519	1358	651	680	250.89	3.17	0.0000000
chrXV	741013	743254	2242	705	1493	1477.38	4.9	0.0000000
chrXV	754486	756020	1535	661	754	209.96	2.72	0.1200000
chrXV	757067	758503	1437	604	653	120.77	2.54	0.0900000
chrXV	760675	763313	2639	590	1536	899.9	3.45	0.0000000
chrXV	768915	771041	2127	1406	1353	1071.06	3.44	0.0000000
chrXV	771731	772999	1269	729	534	72.37	2.29	0.1500000
chrXV	773915	775105	1191	573	541	111.25	3.03	0.0900000
chrXV	778984	782093	3110	1671	1811	862.1	3.19	0.0000000
chrXV	801812	802964	1153	537	481	87.14	2.63	0.1600000
chrXV	806447	807565	1119	547	478	104.6	3.21	0.0900000
chrXV	813172	814381	1210	707	476	52.35	2.12	0.2000000
chrXV	816393	817641	1249	620	616	246.02	3.52	0.0000000
chrXV	817895	819082	1188	607	501	97.84	2.46	0.1700000
chrXV	819875	821360	1486	484	574	59.34	1.97	0.1400000
chrXV	824761	826610	1850	936	1109	792.01	3.63	0.0000000
chrXV	831661	833053	1393	786	664	144.99	2.49	0.1000000
chrXV	835913	838078	2166	1103	1567	1628.28	3.84	0.0000000
chrXV	840542	843119	2578	588	1259	401.07	2.55	0.0000000
chrXV	848919	850814	1896	1373	981	349.74	2.33	0.0000000
chrXV	852804	854859	2056	542	897	106.25	1.9	0.0900000
chrXV	859719	861732	2014	714	1123	532.15	2.92	0.0000000
chrXV	865963	867494	1532	703	751	199.05	2.42	0.1200000
chrXV	876652	878977	2326	1653	1263	474.09	2.28	0.0000000
chrXV	891330	892930	1601	1013	784	277.78	2.63	0.0000000
chrXV	907153	913264	6112	4800	3392	1524.22	2.53	0.0000000
chrXV	920641	921901	1261	641	656	226.07	3.57	0.0000000
chrXV	930100	932408	2309	1042	1114	312.54	2.48	0.0000000
chrXV	938812	940093	1282	595	575	127.28	2.62	0.1000000
chrXV	942758	944314	1557	691	999	780.77	4.16	0.0000000
chrXV	967403	973244	5842	905	3613	1789.95	2.97	0.0000000
chrXV	974844	977444	2601	1142	1257	84.95	2.12	0.1600000
chrXV	977701	980918	3218	1553	1959	1093.41	2.82	0.0000000
chrXV	986064	990317	4254	2941	3270	3100	3.8	0.0000000
chrXV	1002785	1004982	2198	458	824	83.83	2.09	0.1600000
chrXV	1009114	1011118	2005	645	984	334.17	2.71	0.0000000
chrXV	1018133	1019590	1458	719	784	331.97	3.27	0.0000000
chrXV	1035929	1037141	1213	555	551	114.4	2.75	0.0900000
chrXV	1038651	1045345	6695	4763	4300	2787.47	3.16	0.0000000
chrXV	1058555	1059837	1283	622	604	127.16	2.68	0.1000000
chrXV	1063747	1065463	1717	832	958	385.05	2.71	0.0000000
chrXV	1076121	1077447	1327	703	648	138.22	2.69	0.1000000
chrXVI	2	7023	7022	3464	5405	1972.74	3.15	0.0000000
chrXVI	13688	14964	1277	633	611	152.11	2.94	0.1100000
chrXVI	21527	23164	1638	1009	791	262.54	2.72	0.0000000
chrXVI	29320	31099	1780	1166	1011	603.5	3.66	0.0000000
chrXVI	40000	41632	1633	832	835	303.27	2.7	0.0000000
chrXVI	46275	47620	1346	793	557	69.58	2.12	0.1500000
chrXVI	48620	49801	1182	586	516	88.98	2.71	0.1600000
chrXVI	55571	63700	8130	1718	5285	309.92	3.02	0.0000000
chrXVI	73666	76984	3319	1240	1832	735.72	2.62	0.0000000
chrXVI	83483	84863	1381	791	594	66.8	1.99	0.1400000
chrXVI	95879	99040	3162	871	1804	665.94	2.45	0.0000000
chrXVI	104837	107641	2805	2173	1577	808.68	2.98	0.0000000
chrXVI	107758	109082	1325	591	584	103.01	2.23	0.0900000
chrXVI	113255	116209	2955	1688	1887	1465.28	3.32	0.0000000
chrXVI	116364	118797	2434	1918	1056	279.9	2.64	0.0000000
chrXVI	125161	126528	1368	762	592	106.41	2.27	0.0900000
chrXVI	127573	129125	1553	674	797	311.71	2.78	0.0000000
chrXVI	129417	130599	1183	581	475	56	2.02	0.2000000
chrXVI	131760	133402	1643	900	838	322.35	2.88	0.0000000
chrXVI	135059	137139	2081	1557	874	78.23	1.93	0.1500000
chrXVI	138061	139258	1198	618	540	141.66	3.05	0.1000000
chrXVI	146576	147911	1336	774	620	165.94	2.66	0.1100000
chrXVI	163269	164692	1424	752	652	170.21	2.5	0.1100000
chrXVI	165472	166811	1340	701	591	128.03	2.25	0.1000000
chrXVI	187323	189273	1951	558	916	276.13	2.85	0.0000000
chrXVI	194895	196371	1477	842	681	198.77	2.43	0.1200000
chrXVI	197976	199562	1587	481	717	179.66	2.22	0.1100000
chrXVI	207050	208460	1411	570	691	206.98	2.91	0.1200000
chrXVI	211451	212689	1239	708	506	82.78	2.31	0.1600000
chrXVI	213226	216179	2954	1133	1568	739.04	2.99	0.0000000
chrXVI	227069	228994	1926	576	905	221.57	2.22	0.0000000
chrXVI	245812	247406	1595	448	618	50.16	1.94	0.2000000
chrXVI	251206	252346	1141	591	473	59.03	2.52	0.1400000
chrXVI	256385	257719	1335	694	620	152.28	2.58	0.1100000
chrXVI	260581	261878	1298	703	542	73.19	2.15	0.1500000
chrXVI	267024	268426	1403	770	633	135.14	2.26	0.1000000
chrXVI	270519	271869	1351	627	595	103.24	2.23	0.0900000
chrXVI	279493	280794	1302	668	652	184.54	3.13	0.1200000
chrXVI	296076	298156	2081	753	1222	651.26	3.09	0.0000000
chrXVI	318515	319718	1204	631	509	83.4	2.47	0.1600000
chrXVI	325114	327194	2081	1427	964	258.72	2.82	0.0000000
chrXVI	338391	341376	2986	2292	1536	599.98	2.79	0.0000000
chrXVI	351848	353239	1392	775	589	98.26	2.15	0.1700000
chrXVI	354836	356097	1262	607	575	140.41	2.7	0.1000000
chrXVI	369188	371219	2032	1517	825	80.89	2.58	0.1600000
chrXVI	372898	374060	1163	558	485	56.34	2.46	0.2100000
chrXVI	374499	375797	1299	582	564	80.53	2.27	0.1600000
chrXVI	380721	383840	3120	865	1714	880.09	3.19	0.0000000
chrXVI	393341	394556	1216	576	517	67.11	2.29	0.1500000
chrXVI	403860	405063	1204	684	509	62.93	2.45	0.1400000
chrXVI	408255	409580	1326	578	612	106.44	2.33	0.0900000
chrXVI	410772	413040	2269	788	1278	584.51	2.97	0.0000000
chrXVI	420029	421286	1258	716	536	67.4	2.19	0.1500000
chrXVI	424901	426717	1817	781	1129	707.76	3.37	0.0000000
chrXVI	431007	434789	3783	874	2141	1089.71	3.08	0.0000000
chrXVI	444042	445764	1723	1266	677	78.37	1.84	0.1500000
chrXVI	450421	452317	1897	878	971	355.89	2.39	0.0000000
chrXVI	452791	456624	3834	724	2606	2382.18	3.5	0.0000000
chrXVI	463200	464975	1776	865	1216	1008.4	4.27	0.0000000
chrXVI	474631	476256	1626	475	681	114.64	2.12	0.0900000
chrXVI	481313	483077	1765	703	961	497.57	2.88	0.0000000
chrXVI	491090	493761	2672	2025	1556	936.28	2.9	0.0000000
chrXVI	497304	499806	2503	642	1150	243.61	2.69	0.0000000
chrXVI	501966	503954	1989	1162	1024	396.03	3	0.0000000
chrXVI	513717	514930	1214	577	508	64.56	2.34	0.1400000
chrXVI	516670	517969	1300	719	577	86.49	2.25	0.1600000
chrXVI	519866	521149	1284	709	601	146.71	2.93	0.1000000
chrXVI	524934	528589	3656	1964	2146	1176.7	3.52	0.0000000
chrXVI	528754	529944	1191	594	543	115.79	3.01	0.0900000
chrXVI	534221	535501	1281	672	613	161.31	2.85	0.1100000
chrXVI	543435	545010	1576	563	661	67.44	2.02	0.1500000
chrXVI	549969	552632	2664	1972	1643	818.95	3.16	0.0000000
chrXVI	566185	568603	2419	784	1191	276.96	2.67	0.0000000
chrXVI	571831	573358	1528	613	821	313.77	3.22	0.0000000
chrXVI	574657	576923	2267	714	1202	439.84	2.37	0.0000000
chrXVI	581097	584771	3675	1919	1871	496.05	2.86	0.0000000
chrXVI	585333	589208	3876	1919	2295	1415.96	3.27	0.0000000
chrXVI	609422	610917	1496	851	806	320.16	3.02	0.0000000
chrXVI	613998	615327	1330	621	614	137.77	2.43	0.1000000
chrXVI	621993	624195	2203	1338	1243	626.57	2.72	0.0000000
chrXVI	626474	628083	1610	582	696	82.99	2.14	0.1600000
chrXVI	638723	640030	1308	805	564	69.31	2.29	0.1500000
chrXVI	640955	647863	6909	4204	4325	2512.57	3.02	0.0000000
chrXVI	653033	654486	1454	742	979	925.45	5.04	0.0000000
chrXVI	655861	657245	1385	706	714	252.41	3.26	0.0000000
chrXVI	664361	666598	2238	1634	1124	371.73	2.56	0.0000000
chrXVI	676368	680571	4204	2171	2415	1361.79	3.06	0.0000000
chrXVI	680779	682824	2046	1214	1114	426.14	2.76	0.0000000
chrXVI	689192	690602	1411	824	678	170.62	2.8	0.1100000
chrXVI	694532	695979	1448	809	668	135.93	2.19	0.1000000
chrXVI	699557	702313	2757	2074	1504	341.74	2.32	0.0000000
chrXVI	712440	713803	1364	630	726	334.96	3.27	0.0000000
chrXVI	717908	721044	3137	549	1561	591.33	2.84	0.0000000
chrXVI	724496	725707	1212	622	534	121.88	2.77	0.0900000
chrXVI	728545	730432	1888	1208	929	333.09	2.39	0.0000000
chrXVI	731438	732929	1492	770	705	220.31	2.5	0.0000000
chrXVI	743894	745169	1276	723	528	63.77	2.02	0.1400000
chrXVI	753932	755237	1306	656	612	126.01	2.59	0.1000000
chrXVI	789010	790528	1519	765	806	321.31	2.98	0.0000000
chrXVI	791901	793249	1349	836	616	92.9	2.59	0.1700000
chrXVI	796646	798227	1582	881	857	373.22	3.32	0.0000000
chrXVI	804425	811060	6636	5207	4181	615.6	2.93	0.0000000
chrXVI	821292	824449	3158	1008	1636	454.39	2.69	0.0000000
chrXVI	824492	825997	1506	713	773	263.19	2.75	0.0000000
chrXVI	827498	835206	7709	1366	5007	1884.48	3.66	0.0000000
chrXVI	839725	840937	1213	594	540	87.01	2.51	0.1600000
chrXVI	853697	857747	4051	1921	2763	826.29	2.9	0.0000000
chrXVI	859867	864826	4960	942	3570	3124.04	3.97	0.0000000
chrXVI	874176	875710	1535	691	882	493.83	3.64	0.0000000
chrXVI	875998	878513	2516	827	1195	407.14	3.06	0.0000000
chrXVI	882276	884342	2067	941	1367	1192.22	4.16	0.0000000
chrXVI	887286	889216	1931	578	900	235.52	2.82	0.0000000
chrXVI	899037	902448	3412	656	1904	973.53	2.96	0.0000000
chrXVI	906285	907437	1153	631	478	86.3	2.61	0.1600000
chrXVI	910733	911822	1090	517	466	102.71	2.93	0.0900000
chrXVI	920418	921725	1308	670	535	89.59	2.02	0.1600000
chrXVI	926923	929282	2360	1204	1716	2064.01	4.37	0.0000000
