# Supplementary material for: Rvb1/Rvb2 proteins couple transcription and translation during glucose starvation
Source: eLife journal article supplement (doi:10.7554/elife.76965), 2022-09-14
Supplement: supp [file source_data_Fig2sup3_Rvb2.xls]

chr	start	end	length	summit	tags	#NAME?	fold_enrichment	FDR(%)
chrI	32239	36593	4355	2409	1529	610.88	2.84	0
chrI	60547	61868	1322	547	422	76.18	2.25	0.16
chrI	67511	70622	3112	572	1325	876.59	2.95	0
chrI	70920	73849	2930	2032	1338	703.75	2.8	0
chrI	75845	77036	1192	566	414	130.14	3.4	0
chrI	86668	87855	1188	687	363	73.09	2.43	0.15
chrI	92230	93427	1198	694	359	72.14	2.72	0.15
chrI	124272	125526	1255	573	396	86.64	2.65	0
chrI	137891	142047	4157	2221	2231	1299.87	3.01	0
chrI	159934	166695	6762	5471	3757	1388.65	3.1	0
chrI	181982	184073	2092	900	642	115.16	2.37	0
chrI	189819	192135	2317	1858	679	59.7	1.69	0.13
chrI	205510	206941	1432	939	538	300.97	4.44	0
chrII	1	6285	6285	3925	3413	1289.86	3.02	0
chrII	23289	24504	1216	631	393	107.36	2.57	0
chrII	29502	32925	3424	1462	1280	174.29	1.87	0
chrII	33682	35657	1976	1205	683	59.88	2.14	0.13
chrII	68937	70092	1156	507	364	60.12	2.69	0.14
chrII	113071	114319	1249	592	411	118.59	2.63	0
chrII	124263	125582	1320	762	496	249.58	3.29	0
chrII	135253	136799	1547	546	482	104.74	2.06	0
chrII	140125	141779	1655	1084	581	232.25	2.58	0
chrII	163894	165579	1686	1075	608	250.43	2.66	0
chrII	191253	192591	1339	691	444	92.32	2.45	0
chrII	193150	194532	1383	739	472	90.99	2.41	0
chrII	201440	203803	2364	923	795	173.3	2.21	0
chrII	215774	217700	1927	636	672	183.12	2.75	0
chrII	220579	227673	7095	1030	3053	580.53	2.84	0
chrII	235148	238197	3050	981	1131	423.4	2.5	0
chrII	250580	251983	1404	927	439	71.55	2.3	0.15
chrII	254893	257413	2521	1203	1005	435.76	2.47	0
chrII	259445	263045	3601	852	1914	1266.74	3.52	0
chrII	309748	311955	2208	553	757	216.56	2.91	0
chrII	336476	337800	1325	763	413	59.41	2.13	0.13
chrII	337964	340082	2119	678	747	171.8	2.34	0
chrII	340485	342921	2437	1170	941	468.4	2.76	0
chrII	355543	357155	1613	531	504	109.23	2.43	0
chrII	370372	372203	1832	869	730	402.09	2.88	0
chrII	372431	376825	4395	3612	1669	668.81	2.66	0
chrII	378296	379556	1261	593	400	71.45	2.36	0.15
chrII	391193	393170	1978	618	644	126.65	2.09	0
chrII	405384	406718	1335	601	464	142.57	2.82	0
chrII	406778	409370	2593	1634	1041	545.02	2.86	0
chrII	417948	420524	2577	1618	1056	595.12	2.59	0
chrII	426178	427433	1256	720	381	60.84	1.95	0.14
chrII	457781	459081	1301	561	430	117.03	2.71	0
chrII	461235	462490	1256	786	379	59.96	2.07	0.14
chrII	465619	467496	1878	555	616	136.69	2.43	0
chrII	477103	479793	2691	1405	1093	224.84	2.07	0
chrII	488044	491782	3739	2900	1578	921.88	2.91	0
chrII	554306	556431	2126	1091	878	642.65	3.1	0
chrII	564462	566112	1651	1170	490	101.08	2.12	0
chrII	595060	596404	1345	732	425	98.9	2.4	0
chrII	612746	615981	3236	2481	1101	315.94	2.14	0
chrII	618075	619421	1347	755	491	167.02	2.94	0
chrII	624346	625879	1534	632	489	101.84	2.08	0
chrII	642098	643375	1278	532	392	93.63	2.16	0
chrII	646693	647943	1251	719	406	130.2	2.83	0
chrII	650588	652111	1524	591	531	138.78	2.3	0
chrII	652276	653655	1380	553	415	68.4	1.86	0.15
chrII	678726	681639	2914	1690	1213	789.18	3.09	0
chrII	686063	687298	1236	455	377	64	2.15	0.14
chrII	786318	787477	1160	577	341	64.64	2.38	0.14
chrII	804351	805644	1294	721	392	65.08	1.97	0.14
chrIII	1	892	892	202	505	686.51	5.89	0
chrIII	24174	25394	1221	652	386	84.76	2.67	0.17
chrIII	49945	53327	3383	2164	1851	1908.1	3.64	0
chrIII	60634	62068	1435	525	434	55.67	1.95	0.13
chrIII	64978	66188	1211	602	412	93.75	2.93	0
chrIII	68129	69312	1184	570	377	59.06	2.56	0.13
chrIII	75437	78955	3519	2789	1493	801.38	3.92	0
chrIII	83804	92666	8863	7109	4008	289.3	2.76	0
chrIII	102750	106263	3514	558	1134	211.34	2.51	0
chrIII	106991	108547	1557	563	488	75.45	1.91	0.16
chrIII	117887	119243	1357	730	488	169.56	3.12	0
chrIII	119439	121053	1615	968	546	150.82	2.06	0
chrIII	121941	124607	2667	815	1366	1271.91	3.68	0
chrIII	124661	125968	1308	719	400	52.93	1.97	0.13
chrIII	127162	128355	1194	611	370	63.5	2.34	0.14
chrIII	136608	139572	2965	1872	1632	1151.94	3.27	0
chrIII	155642	158752	3111	2149	1364	966.79	3.3	0
chrIII	162971	164473	1503	637	508	133.32	2.47	0
chrIII	167923	169942	2020	598	798	280.21	2.5	0
chrIII	224991	227067	2077	471	584	64.09	1.77	0.14
chrIII	227507	229202	1696	1161	571	144.2	2.36	0
chrIII	251956	253475	1520	715	728	673.83	4.38	0
chrIII	279529	280662	1134	585	352	72.5	2.83	0.15
chrIV	41735	42979	1245	572	419	113.98	2.98	0
chrIV	51604	52796	1193	609	403	115.99	3.11	0
chrIV	61614	63253	1640	884	596	217.63	2.48	0
chrIV	72829	74691	1863	546	596	141.35	2.5	0
chrIV	83112	84363	1252	479	388	83.85	2.24	0.17
chrIV	106126	107734	1609	922	561	174.49	2.51	0
chrIV	121090	122521	1432	709	631	395.68	4.08	0
chrIV	134091	135849	1759	778	645	204.17	2.56	0
chrIV	147326	148643	1318	522	438	123.62	2.63	0
chrIV	171785	172926	1142	586	339	71.83	2.29	0.15
chrIV	190357	191415	1059	515	312	63.57	3.11	0.14
chrIV	197868	199203	1336	565	477	173.4	3.09	0
chrIV	215212	216557	1346	590	419	82.21	2.15	0.17
chrIV	220782	222663	1882	1411	528	84.4	2.07	0.17
chrIV	238202	242476	4275	1710	1731	915.37	3.15	0
chrIV	263817	265654	1838	598	553	93.31	1.87	0
chrIV	271351	272552	1202	564	394	104.5	2.87	0
chrIV	286162	287603	1442	933	533	223.6	2.8	0
chrIV	304350	305629	1280	694	412	94.6	2.39	0
chrIV	314391	315808	1418	531	474	131.24	2.42	0
chrIV	333833	335291	1459	971	448	53.85	2	0.13
chrIV	356671	358064	1394	576	437	93.44	2.19	0
chrIV	365639	367475	1837	888	696	327.81	2.67	0
chrIV	367492	369646	2155	1245	895	637.74	3.17	0
chrIV	398736	399920	1185	644	383	76.9	2.73	0.16
chrIV	404348	405561	1214	575	431	149.33	3.42	0
chrIV	410646	413842	3197	892	1297	637.85	2.81	0
chrIV	421239	422394	1156	610	352	51.07	2.39	0.13
chrIV	430969	432737	1769	1209	648	224.39	2.8	0
chrIV	432855	434733	1879	1355	568	87.05	2.01	0
chrIV	447091	448328	1238	715	371	59.67	2.3	0.13
chrIV	453725	455645	1921	1113	607	111.72	1.9	0
chrIV	461112	462848	1737	628	551	85.61	1.96	0
chrIV	504245	505398	1154	641	341	61.34	2.39	0.14
chrIV	505600	507901	2302	1580	823	332.86	2.31	0
chrIV	513361	520100	6740	5436	2923	452.24	2.06	0
chrIV	541091	543177	2087	1274	708	188.49	2.89	0
chrIV	543362	544770	1409	845	448	100.36	2.18	0
chrIV	545525	546884	1360	672	432	68.04	2.09	0.15
chrIV	550262	551930	1669	1002	675	323.4	2.82	0
chrIV	555322	557409	2088	712	832	297.29	2.58	0
chrIV	562088	563653	1566	738	545	172.37	2.52	0
chrIV	587289	588987	1699	374	508	94.04	2.02	0
chrIV	590586	597291	6706	1318	2932	1969.19	3.48	0
chrIV	599135	602609	3475	1411	1426	897.96	2.67	0
chrIV	615904	617108	1205	550	382	103.47	2.73	0
chrIV	635641	637426	1786	797	761	523.31	3.34	0
chrIV	644713	651727	7015	5928	3590	815.2	3.17	0
chrIV	654219	655529	1311	584	415	74.75	2.23	0.16
chrIV	667536	668690	1155	829	332	59.9	2.1	0.13
chrIV	690207	691381	1175	584	358	77.9	2.4	0.16
chrIV	720218	723541	3324	2637	1283	649.25	2.41	0
chrIV	767793	770368	2576	565	1014	482.82	2.72	0
chrIV	793813	795092	1280	688	457	176.99	3.13	0
chrIV	801978	805858	3881	1729	1331	327.09	2.38	0
chrIV	805915	808632	2718	1689	995	251.4	2.05	0
chrIV	811160	812619	1460	713	476	114.04	2.11	0
chrIV	835302	836884	1583	652	613	353.36	3.22	0
chrIV	867115	868613	1499	1048	442	56.77	1.81	0.13
chrIV	893443	894898	1456	744	477	81.81	2.16	0.16
chrIV	913850	916752	2903	1139	1269	790.27	2.72	0
chrIV	923449	925163	1715	506	561	107.03	2.19	0
chrIV	929901	931181	1281	685	474	189.47	3.43	0
chrIV	954588	956018	1431	698	518	234.29	3.09	0
chrIV	959569	960689	1121	658	329	64.99	2.29	0.14
chrIV	976271	977693	1423	557	464	126.79	2.41	0
chrIV	1010810	1012599	1790	1155	646	244.17	2.67	0
chrIV	1012780	1015559	2780	1252	1098	405.83	3.18	0
chrIV	1015722	1017509	1788	594	569	131.95	2.43	0
chrIV	1049024	1050705	1682	663	562	137.93	2.2	0
chrIV	1054545	1056761	2217	689	738	197.21	2.23	0
chrIV	1095502	1101968	6467	1189	3626	1647.57	3.07	0
chrIV	1124587	1126536	1950	1421	615	109.25	2.37	0
chrIV	1127073	1128362	1290	552	400	63.44	2.06	0.14
chrIV	1135112	1136645	1534	669	956	1518.33	7.16	0
chrIV	1153402	1158232	4831	1651	3126	2597.99	3.71	0
chrIV	1158904	1167331	8428	1475	5188	1507.69	3.84	0
chrIV	1168455	1169638	1184	580	372	52.48	2.41	0.13
chrIV	1182378	1184899	2522	1327	967	348.53	2.54	0
chrIV	1189177	1190586	1410	846	460	110.4	2.24	0
chrIV	1201402	1202591	1190	502	349	64.08	2.31	0.14
chrIV	1206419	1212847	6429	1125	3437	1215.13	3.15	0
chrIV	1233060	1234266	1207	581	369	72.45	2.31	0.15
chrIV	1235649	1237422	1774	1286	526	51.72	1.7	0.13
chrIV	1241852	1243708	1857	647	691	297.74	2.92	0
chrIV	1257914	1259155	1242	695	374	70.29	2.37	0.15
chrIV	1276379	1280428	4050	905	1485	656.46	3	0
chrIV	1287686	1289450	1765	1249	533	71.97	2.1	0.15
chrIV	1293728	1295013	1286	715	485	212.75	3.38	0
chrIV	1318686	1320555	1870	847	665	266.66	2.62	0
chrIV	1333499	1334885	1387	674	464	144.53	2.37	0
chrIV	1352180	1353270	1091	664	316	51.79	2.73	0.13
chrIV	1366923	1368032	1110	576	339	63.64	2.94	0.14
chrIV	1385257	1387306	2050	520	670	191.09	2.44	0
chrIV	1409898	1412607	2710	553	952	287.53	2.03	0
chrIV	1419953	1421326	1374	507	425	73.94	2.12	0.15
chrIV	1433741	1434990	1250	656	372	66.39	2.08	0.14
chrIV	1436018	1437436	1419	753	509	190.1	2.67	0
chrIV	1458901	1460520	1620	803	658	368.19	3.19	0
chrIV	1468323	1471328	3006	1013	1000	261.67	2.28	0
chrIV	1474663	1477757	3095	2199	1248	610.54	2.99	0
chrIV	1489476	1491202	1727	1036	619	276.87	2.87	0
chrIV	1495976	1497297	1322	710	397	76.36	2.15	0.16
chrIX	1	9650	9650	4035	5074	1039.72	3.22	0
chrIX	21337	23100	1764	582	546	71	2.02	0.15
chrIX	47147	48472	1326	668	395	67.75	1.97	0.14
chrIX	52793	56058	3266	2127	1244	482.38	2.64	0
chrIX	82623	83917	1295	664	461	153.99	3.14	0
chrIX	92357	94925	2569	951	939	286.39	2.38	0
chrIX	138392	140088	1697	995	627	272.27	2.79	0
chrIX	159663	160865	1203	545	361	53.08	2.27	0.13
chrIX	177011	178202	1192	676	362	65.34	2.34	0.14
chrIX	204474	211138	6665	2876	2759	277.04	2.79	0
chrIX	243440	245018	1579	1021	523	112.29	2.59	0
chrIX	248266	250240	1975	1141	891	648.87	3.33	0
chrIX	253603	256325	2723	1106	1068	531.79	3.29	0
chrIX	256885	259088	2204	1619	728	196.8	2.47	0
chrIX	275645	276979	1335	623	565	330.18	4.19	0
chrIX	282302	283409	1108	569	348	74.72	3.04	0.15
chrIX	288424	289671	1248	581	463	222.09	3.74	0
chrIX	299533	300688	1156	546	357	81.16	2.63	0.16
chrIX	369318	370509	1192	563	371	54.17	2.45	0.13
chrIX	380765	385006	4242	1814	1539	384.82	2	0
chrM	1516	3565	2050	538	860	192.96	2.29	0
chrM	3764	9988	6225	3581	2690	270.95	2.31	0
chrM	27727	29488	1762	1261	749	215.61	2.78	0
chrM	30540	32260	1721	1146	636	87.8	2.38	0
chrV	3	6748	6746	3777	3603	1641.37	3.46	0
chrV	39311	43255	3945	3504	1267	224.82	1.89	0
chrV	57748	59093	1346	644	534	228.65	3.84	0
chrV	61320	62753	1434	1010	419	55.02	2.34	0.13
chrV	68491	70856	2366	1061	1005	601.72	2.82	0
chrV	79211	80956	1746	1098	595	139.87	2.3	0
chrV	84306	87219	2914	725	1422	1088.23	4.09	0
chrV	99065	101143	2079	1087	615	67.54	1.98	0.14
chrV	116755	118538	1784	1097	737	381.27	3.6	0
chrV	122665	123891	1227	606	378	75.51	2.29	0.16
chrV	132186	136216	4031	801	1883	1302.37	2.84	0
chrV	140032	142070	2039	803	903	655.95	3.58	0
chrV	149603	151794	2192	593	729	176.77	2.32	0
chrV	151943	153871	1929	1247	653	195.85	2.33	0
chrV	166990	168110	1121	574	356	79.34	2.7	0.16
chrV	176718	178347	1630	988	509	68.32	1.91	0.15
chrV	191391	193226	1836	1295	575	59.18	1.72	0.13
chrV	193885	196017	2133	915	803	328.43	2.47	0
chrV	211143	213834	2692	2062	933	304.37	2.29	0
chrV	221615	223733	2119	662	820	380.56	2.4	0
chrV	224985	226158	1174	540	353	68.56	2.47	0.15
chrV	236959	239017	2059	1511	675	182.14	2.2	0
chrV	241499	243437	1939	881	802	549.37	3.13	0
chrV	258047	262513	4467	1993	1600	591.07	2.55	0
chrV	268025	269287	1263	576	400	94.4	2.53	0
chrV	271370	272916	1547	1160	457	69.4	1.87	0.15
chrV	280640	282809	2170	892	858	401.92	2.87	0
chrV	284100	285577	1478	723	566	249.4	3.03	0
chrV	291004	293329	2326	1229	1094	643.79	2.85	0
chrV	302265	304309	2045	1289	832	490.2	3.12	0
chrV	311051	312490	1440	708	499	114.28	2.23	0
chrV	318033	319202	1170	660	373	74.68	2.75	0.15
chrV	334432	336577	2146	1254	878	429.01	2.88	0
chrV	348684	350052	1369	751	467	89.03	2.38	0
chrV	354413	355836	1424	705	515	151.27	2.65	0
chrV	400147	401596	1450	678	528	168.66	2.54	0
chrV	409122	410283	1162	573	363	71.83	2.6	0.15
chrV	422217	423660	1444	565	437	78.73	2.11	0.16
chrV	430430	433433	3004	1772	1215	664.23	2.93	0
chrV	434082	436327	2246	756	798	220.3	2.68	0
chrV	438347	439937	1591	951	545	141.04	2.56	0
chrV	441510	449914	8405	697	4917	603.21	4.03	0
chrV	461346	463467	2122	750	782	273.03	2.43	0
chrV	473611	475454	1844	1117	640	163.71	2.08	0
chrV	490369	491685	1317	553	443	76.2	2.59	0.16
chrV	491848	498671	6824	5949	3410	665.33	2.9	0
chrV	502868	505537	2670	1022	889	244.62	2.52	0
chrV	543837	547256	3420	608	1303	575.56	2.42	0
chrV	558650	559775	1126	574	363	85.73	3.1	0
chrV	569615	572533	2919	1172	1265	244.8	2.38	0
chrVI	2	5296	5295	2664	3326	1951.57	3.17	0
chrVI	27231	28690	1460	835	434	91.09	2.05	0
chrVI	54151	55381	1231	643	359	63.12	1.88	0.14
chrVI	55397	56865	1469	696	603	346.67	3.18	0
chrVI	74276	77202	2927	2461	886	166.85	1.92	0
chrVI	94890	96544	1655	1070	618	281.29	2.81	0
chrVI	105704	108155	2452	1050	881	324.12	2.55	0
chrVI	109361	110561	1201	568	411	116.72	3.26	0
chrVI	137302	144228	6927	1241	3064	640.39	2.35	0
chrVI	152649	153944	1296	742	467	162.36	3.11	0
chrVI	173360	177400	4041	3249	1781	945.71	3.07	0
chrVI	181973	184931	2959	2205	1063	273.65	2.5	0
chrVI	209822	211376	1555	535	499	87.74	2.05	0
chrVI	223569	227220	3652	1716	1263	210.92	2.01	0
chrVI	228574	229767	1194	591	379	78.35	2.61	0.16
chrVI	233293	234524	1232	686	399	110.47	2.88	0
chrVI	251175	256736	5562	688	2420	1768.13	3.45	0
chrVII	22749	25626	2878	2388	924	145.44	1.97	0
chrVII	66740	68076	1337	839	413	59.31	2.22	0.13
chrVII	80652	81749	1098	516	332	67.04	2.69	0.14
chrVII	93241	96151	2911	554	1108	549.96	2.93	0
chrVII	115089	116171	1083	464	321	58.27	2.39	0.13
chrVII	121935	125118	3184	1776	1038	268.65	2.52	0
chrVII	143870	145244	1375	847	423	85.12	2.2	0.17
chrVII	164448	167126	2679	1608	1103	711.33	3.03	0
chrVII	179915	181381	1467	776	677	492.18	3.92	0
chrVII	190230	191696	1467	700	581	270.64	3.43	0
chrVII	196884	198327	1444	746	442	75.79	2.18	0.16
chrVII	205183	207038	1856	1373	570	113.55	2.22	0
chrVII	225235	226645	1411	527	430	75.05	2.24	0.16
chrVII	270287	272575	2289	684	828	245.52	2.29	0
chrVII	280117	281503	1387	681	427	57.15	1.9	0.13
chrVII	286792	287976	1185	607	379	79.6	2.57	0.16
chrVII	305907	307188	1282	657	465	187.94	3.4	0
chrVII	319171	320445	1275	508	412	67.56	2.29	0.14
chrVII	324237	325383	1147	630	338	70.2	2.3	0.15
chrVII	345665	347593	1929	1431	612	157.31	2.14	0
chrVII	370484	371899	1416	858	483	121.67	2.27	0
chrVII	374392	375613	1222	685	376	50.95	2.29	0.13
chrVII	383995	385426	1432	633	458	80.65	2.08	0.16
chrVII	397575	400341	2767	786	1088	567.6	3.05	0
chrVII	400926	402997	2072	872	696	210.53	2.05	0
chrVII	403652	406063	2412	1069	769	169.25	2.36	0
chrVII	410905	414319	3415	2513	1251	395.02	2.73	0
chrVII	422630	423925	1296	549	424	78.7	2.61	0.16
chrVII	426546	429156	2611	504	943	233.49	2.44	0
chrVII	432436	434508	2073	1098	905	688.57	3.54	0
chrVII	451566	453001	1436	782	614	328.98	4.04	0
chrVII	474666	475979	1314	579	433	86.58	2.38	0
chrVII	482830	486019	3190	1572	1430	1004.79	3.01	0
chrVII	505495	507421	1927	1435	558	51.44	2.02	0.13
chrVII	507446	509207	1762	1177	679	275.3	2.69	0
chrVII	524499	526623	2125	1110	758	214.84	2.33	0
chrVII	527030	529751	2722	1810	1066	520.3	3.64	0
chrVII	534460	542508	8049	1832	4040	763.09	3.2	0
chrVII	546874	548891	2018	625	625	107.01	2.04	0
chrVII	561241	568067	6827	5604	3675	1129.67	3.06	0
chrVII	568478	575068	6591	5277	2976	650.89	2.01	0
chrVII	583581	585228	1648	747	602	222.79	2.66	0
chrVII	591642	594061	2420	1222	999	573.34	3.14	0
chrVII	598500	599649	1150	642	346	64.34	2.51	0.14
chrVII	609040	610750	1711	983	661	381.03	2.89	0
chrVII	624622	626277	1656	884	624	244.34	2.66	0
chrVII	648531	652003	3473	2397	1271	414.55	2.13	0
chrVII	652900	657094	4195	1462	1851	1176.98	2.85	0
chrVII	676750	679200	2451	1133	937	443.4	2.88	0
chrVII	699181	701366	2186	706	766	308.8	3.07	0
chrVII	702246	703470	1225	672	375	80.58	2.32	0.16
chrVII	706842	707892	1051	581	328	50.92	2.33	0.13
chrVII	708312	710253	1942	963	853	279.36	3.03	0
chrVII	719703	720812	1110	585	332	51.02	2.54	0.13
chrVII	732327	734245	1919	1063	777	513.9	3.16	0
chrVII	738806	740224	1419	934	450	81.62	2.25	0.16
chrVII	752177	754970	2794	2239	1045	458.46	3.1	0
chrVII	760611	761878	1268	506	394	72.03	2.38	0.15
chrVII	765645	767679	2035	1131	797	383.59	2.98	0
chrVII	774070	775386	1317	692	403	55.46	2.04	0.13
chrVII	784898	786492	1595	848	629	289.17	2.86	0
chrVII	787913	789235	1323	458	400	55.89	2.15	0.13
chrVII	797734	798940	1207	620	380	68.61	2.51	0.15
chrVII	801298	802639	1342	794	411	68.61	2.06	0.15
chrVII	809084	811073	1990	583	726	192.78	2.58	0
chrVII	831829	833077	1249	630	468	197.74	3.71	0
chrVII	845213	846864	1652	460	497	54.84	1.97	0.13
chrVII	856196	860194	3999	723	1544	548.35	2.48	0
chrVII	866904	868315	1412	813	516	176.82	2.88	0
chrVII	877901	880568	2668	843	922	241.89	2.62	0
chrVII	882080	884718	2639	1225	1638	1553.75	3.92	0
chrVII	904180	906213	2034	1179	865	505.71	3.59	0
chrVII	952935	954408	1474	567	498	164.89	2.75	0
chrVII	958104	960013	1910	1022	714	358.66	2.72	0
chrVII	961710	963422	1713	576	530	119.45	2.45	0
chrVII	968068	969903	1836	611	609	158.57	2.8	0
chrVII	973793	975099	1307	617	396	68.35	2.07	0.15
chrVII	976290	977628	1339	771	388	52.99	1.87	0.13
chrVII	985783	988744	2962	2059	1091	512.21	2.47	0
chrVII	989018	990740	1723	712	555	144.48	2.18	0
chrVII	993462	994764	1303	650	457	172.76	2.75	0
chrVII	999544	1002885	3342	2038	2007	1913.99	3.54	0
chrVII	1025600	1027767	2168	1403	812	390.86	2.53	0
chrVII	1051742	1052947	1206	456	355	66.74	2.13	0.14
chrVII	1075636	1076873	1238	586	394	97.69	2.45	0
chrVII	1083858	1086514	2657	700	1375	700.9	3.75	0
chrVIII	1	5324	5324	3408	2713	1171.53	3.64	0
chrVIII	16932	18838	1907	447	572	118.4	2.01	0
chrVIII	47743	49013	1271	549	420	110.97	2.87	0
chrVIII	54139	56461	2323	1447	925	338.26	2.35	0
chrVIII	64053	66954	2902	2056	1161	506.26	2.27	0
chrVIII	97840	99606	1767	1151	591	148.54	2.19	0
chrVIII	101581	103195	1615	1021	563	169.96	2.58	0
chrVIII	114864	116501	1638	1083	516	72	2.06	0.15
chrVIII	121544	124344	2801	999	1268	831.15	3.49	0
chrVIII	189337	190764	1428	763	444	77.98	2.15	0.16
chrVIII	211870	216632	4763	795	4194	3100	3.94	0
chrVIII	237101	238262	1162	773	336	50.13	2.18	0.12
chrVIII	266466	267707	1242	616	390	84.47	2.36	0.17
chrVIII	279703	281817	2115	651	860	508.95	2.71	0
chrVIII	286499	290568	4070	3302	1544	614.77	2.43	0
chrVIII	292359	294717	2359	1684	762	145.84	2.2	0
chrVIII	296413	298033	1621	558	528	110.39	2.58	0
chrVIII	298242	299562	1321	519	417	66.88	2.15	0.14
chrVIII	315543	316889	1347	786	435	82.1	2.37	0.17
chrVIII	340963	342688	1726	609	522	71.87	2.06	0.15
chrVIII	373779	375512	1734	617	596	170.5	3.28	0
chrVIII	376736	378365	1630	1077	488	92.55	2.41	0
chrVIII	388452	389835	1384	984	408	78.79	2.28	0.16
chrVIII	421991	423217	1227	556	386	78.41	2.47	0.16
chrVIII	450119	453309	3191	1613	1623	1092.83	2.76	0
chrVIII	461151	462660	1510	1044	436	57.08	1.98	0.13
chrVIII	483296	485139	1844	583	589	84.31	2.04	0.17
chrVIII	487693	489134	1442	921	417	57.55	2.03	0.13
chrVIII	498069	499643	1575	1023	495	82.57	2.24	0.17
chrVIII	521664	523470	1807	1375	529	52.81	1.83	0.13
chrVIII	543211	549941	6731	5715	3478	1026.94	3.19	0
chrX	1	7832	7832	3889	4633	1886.92	3.16	0
chrX	35937	38370	2434	732	907	441.34	3.11	0
chrX	82998	84574	1577	1059	489	74.9	2.47	0.16
chrX	93941	95543	1603	596	561	146.05	2.47	0
chrX	100469	101671	1203	651	372	60.99	2.3	0.14
chrX	109004	110531	1528	707	548	199.78	2.91	0
chrX	110799	112246	1448	666	538	209.47	2.98	0
chrX	115361	118238	2878	1699	970	254.9	2.21	0
chrX	118796	122361	3566	1033	1628	1273.24	2.86	0
chrX	139009	140440	1432	455	433	82.64	2.03	0.17
chrX	150061	151473	1413	837	469	110.11	2.84	0
chrX	179878	182304	2427	1223	990	553.88	3.11	0
chrX	203545	205631	2087	596	668	142.21	2.24	0
chrX	219649	221253	1605	828	557	175.43	2.27	0
chrX	227445	228845	1401	640	474	122.54	2.61	0
chrX	236182	237703	1522	630	486	95.5	2.19	0
chrX	278240	279384	1145	560	351	83.47	2.79	0.17
chrX	290399	292309	1911	1104	649	160	2.21	0
chrX	293661	295686	2026	1001	826	434.12	2.8	0
chrX	315090	317388	2299	1682	930	553.48	3.73	0
chrX	332744	334276	1533	642	647	387.39	4.26	0
chrX	337022	339731	2710	1883	1149	506.5	2.49	0
chrX	347855	349867	2013	1134	761	312.22	3.18	0
chrX	353912	356078	2167	1516	606	91.33	2.82	0
chrX	373909	375044	1136	594	358	62.55	2.9	0.14
chrX	390692	392665	1974	1243	752	272.5	2.35	0
chrX	404319	405900	1582	759	560	162.37	2.52	0
chrX	412851	414097	1247	544	416	93.84	2.92	0
chrX	423809	424943	1135	573	358	70.78	2.6	0.15
chrX	434049	435703	1655	624	602	222.97	2.42	0
chrX	453099	455540	2442	1121	1168	660.44	3.2	0
chrX	465870	467632	1763	1113	665	254.27	2.58	0
chrX	518783	522378	3596	1152	1179	184.62	1.82	0
chrX	544691	546349	1659	903	605	196.44	2.34	0
chrX	554406	556413	2008	1531	556	51.84	2.26	0.13
chrX	558552	559848	1297	550	432	87.47	2.5	0
chrX	572476	573870	1395	749	459	93.07	2.35	0
chrX	584670	586503	1834	716	619	183.83	2.46	0
chrX	610355	612632	2278	795	741	115.6	2.02	0
chrX	614704	615881	1178	578	371	53.02	2.42	0.13
chrX	617001	618651	1651	1069	540	91.25	2.52	0
chrX	621735	625240	3506	1541	1477	685.15	2.72	0
chrX	637572	641075	3504	2863	1265	385.71	2.39	0
chrX	662289	664681	2393	529	776	149	1.91	0
chrXI	37794	39777	1984	1351	804	338.89	3.59	0
chrXI	67607	71283	3677	690	1451	739.79	2.75	0
chrXI	75070	76444	1375	760	468	105.36	2.56	0
chrXI	79976	81099	1124	532	351	71.92	2.79	0.15
chrXI	91605	94213	2609	1803	885	225.29	2.24	0
chrXI	98754	100630	1877	752	767	352.49	2.82	0
chrXI	142758	144467	1710	630	565	175.76	2.11	0
chrXI	163009	167506	4498	3317	1953	1203.94	2.69	0
chrXI	170688	172218	1531	715	552	204.86	2.91	0
chrXI	202303	203782	1480	532	500	105.82	2.58	0
chrXI	229572	234611	5040	1131	1945	1091.07	3.53	0
chrXI	257969	261362	3394	767	1334	671.84	2.51	0
chrXI	269017	270144	1128	544	338	54.68	2.39	0.13
chrXI	277408	280869	3462	1204	1157	330.51	2.11	0
chrXI	307086	309495	2410	1806	828	248.53	2.69	0
chrXI	316394	318195	1802	814	664	251.44	2.58	0
chrXI	321202	323498	2297	748	1023	732.85	2.81	0
chrXI	325397	329061	3665	1398	1773	1117.57	3.23	0
chrXI	340175	342013	1839	801	693	309.6	2.99	0
chrXI	354693	356686	1994	1374	740	338.92	2.45	0
chrXI	364274	365732	1459	897	466	105.32	2.34	0
chrXI	368526	372262	3737	855	1619	944.08	2.75	0
chrXI	381136	383715	2580	945	914	413.4	3.12	0
chrXI	391580	392906	1327	669	521	273.04	3.68	0
chrXI	401548	403009	1462	569	502	144.83	2.52	0
chrXI	417362	418763	1402	635	664	575.76	4.94	0
chrXI	428496	429706	1211	715	361	53.27	2.05	0.13
chrXI	434270	435663	1394	853	469	114.86	2.47	0
chrXI	436947	438127	1181	557	371	78.17	2.63	0.16
chrXI	450807	452730	1924	1356	708	252.47	2.69	0
chrXI	454115	455600	1486	768	479	68.44	2	0.15
chrXI	462315	464203	1889	1262	591	118.95	2.33	0
chrXI	505885	507115	1231	575	417	105.14	2.98	0
chrXI	512712	519553	6842	5890	2795	1095.3	3.32	0
chrXI	526117	528028	1912	523	615	89.76	2.06	0
chrXI	565392	566480	1089	515	331	68.14	2.56	0.15
chrXI	566827	568499	1673	1003	553	117.3	2.23	0
chrXI	577847	581801	3955	1198	1471	551.06	2.86	0
chrXI	613873	615965	2093	1483	871	589.71	3.17	0
chrXII	1	11874	11874	9160	7839	687.88	3.72	0
chrXII	39848	40939	1092	570	320	59.38	2.74	0.13
chrXII	48890	50195	1306	765	394	70.61	2.33	0.15
chrXII	63110	66513	3404	536	1245	463.84	2.81	0
chrXII	82864	84907	2044	1437	722	227.8	2.2	0
chrXII	87874	91904	4031	2506	1864	780.5	2.35	0
chrXII	95199	99467	4269	1751	2029	841.67	3.25	0
chrXII	107829	109808	1980	1209	732	296.99	2.36	0
chrXII	130262	131587	1326	578	473	180.75	3.36	0
chrXII	162772	164641	1870	679	597	106.82	2.18	0
chrXII	186914	188505	1592	818	628	334.45	3.02	0
chrXII	197598	199929	2332	1798	663	83.39	1.97	0.17
chrXII	214563	216841	2279	697	870	190.5	2.22	0
chrXII	216933	221344	4412	3399	2395	1512.44	3.2	0
chrXII	231488	235526	4039	3029	2042	1755.22	3.24	0
chrXII	259471	261449	1979	1544	541	59.4	2.1	0.13
chrXII	278182	279341	1160	673	338	55.78	2.26	0.13
chrXII	319600	321057	1458	928	443	81.42	2.2	0.16
chrXII	327122	328387	1266	668	377	52.58	2.04	0.13
chrXII	331574	333011	1438	791	597	342.22	3.77	0
chrXII	340495	342156	1662	693	767	584.19	4.26	0
chrXII	367873	372202	4330	1974	2350	2021.34	3.28	0
chrXII	383951	385994	2044	602	601	66.1	2.48	0.14
chrXII	387363	389751	2389	1204	802	266.31	2.41	0
chrXII	389946	391409	1464	895	460	73.99	1.96	0.15
chrXII	416452	418674	2223	596	685	105.58	2.23	0
chrXII	423124	425488	2365	1540	1169	1029.68	3.42	0
chrXII	444560	445770	1211	490	378	70.84	2.39	0.15
chrXII	447080	450342	3263	2252	1223	197.75	2.11	0
chrXII	450975	490962	39988	10457	49513	1082.87	4.75	0
chrXII	510000	512538	2539	604	935	287.83	2.13	0
chrXII	512605	515064	2460	1718	915	310.29	2.09	0
chrXII	533777	534985	1209	582	428	124.19	3.32	0
chrXII	540299	542409	2111	945	688	129.87	1.87	0
chrXII	551279	555118	3840	744	1740	1340.41	4.21	0
chrXII	558935	560077	1143	557	357	64.72	2.71	0.14
chrXII	566099	567451	1353	640	412	62.65	2.04	0.14
chrXII	592907	596749	3843	1053	2047	846.29	3.21	0
chrXII	597098	599340	2243	728	885	91.68	2.08	0
chrXII	602355	606164	3810	3013	1372	500.23	3.03	0
chrXII	632830	634176	1347	634	478	157.58	2.76	0
chrXII	635764	636944	1181	624	367	63.76	2.5	0.14
chrXII	644608	646882	2275	1119	1024	749.22	3.35	0
chrXII	668676	670206	1531	1011	447	59.86	1.81	0.13
chrXII	703783	705559	1777	555	649	281.71	3.26	0
chrXII	721301	724206	2906	2209	957	241.72	2.27	0
chrXII	724989	726511	1523	627	484	98.92	2.06	0
chrXII	727841	729118	1278	703	404	68.77	2.56	0.15
chrXII	731398	732757	1360	528	442	90.83	2.49	0
chrXII	782351	785080	2730	1502	1106	599.15	2.55	0
chrXII	795996	797804	1809	1395	565	73.73	2	0.15
chrXII	808411	809693	1283	718	394	64.01	2.19	0.14
chrXII	826183	829100	2918	2012	1078	398	2.34	0
chrXII	837184	838753	1570	872	528	158.2	2.34	0
chrXII	839102	840705	1604	571	479	80.78	2.06	0.16
chrXII	861663	863102	1440	713	536	269.18	3.19	0
chrXII	870837	872074	1238	581	391	87.36	2.51	0
chrXII	874682	875882	1201	594	384	75.04	2.56	0.16
chrXII	876891	878567	1677	1014	604	227.78	2.99	0
chrXII	902269	903698	1430	692	445	78.54	1.99	0.16
chrXII	921212	922490	1279	743	399	68	2.17	0.15
chrXII	924352	925608	1257	593	520	351.29	4.49	0
chrXII	940845	947463	6619	1648	2925	687.41	1.98	0
chrXII	949169	951343	2175	1095	835	343.14	2.53	0
chrXII	953943	955522	1580	895	603	289.63	2.73	0
chrXII	975877	982049	6173	713	2633	689.95	2.39	0
chrXII	1010806	1015138	4333	3404	1595	709.78	3.12	0
chrXII	1027349	1029065	1717	571	578	207.17	2.55	0
chrXII	1031972	1033068	1097	505	333	65.82	2.89	0.14
chrXIII	2	5958	5957	3502	3733	2539.66	3.13	0
chrXIII	14034	17641	3608	741	1610	1027	3.7	0
chrXIII	43010	44173	1164	514	361	51.72	2.59	0.13
chrXIII	69338	73405	4068	2448	1914	1011.96	2.5	0
chrXIII	103693	105230	1538	945	484	89.01	2.25	0
chrXIII	118728	120154	1427	748	485	130.4	2.32	0
chrXIII	128904	130199	1296	731	403	64.58	2.2	0.14
chrXIII	165920	169148	3229	1826	1257	606.41	2.59	0
chrXIII	183778	190417	6640	1106	3712	1420.75	2.97	0
chrXIII	195358	202559	7202	1860	4063	1765.25	2.96	0
chrXIII	219366	221379	2014	1466	653	102.13	1.96	0
chrXIII	236015	237082	1068	500	316	65.67	2.67	0.14
chrXIII	250963	252260	1298	575	405	66.64	2.14	0.14
chrXIII	252699	254029	1331	543	434	91.84	2.43	0
chrXIII	258281	259682	1402	599	521	197.66	3.1	0
chrXIII	266614	268126	1513	1077	441	50	1.78	0.12
chrXIII	282250	284101	1852	1019	706	261.96	2.66	0
chrXIII	286462	290264	3803	1819	1821	1227.29	2.74	0
chrXIII	305373	307405	2033	528	806	388.18	2.6	0
chrXIII	318033	319238	1206	625	394	93.37	2.73	0
chrXIII	346499	348675	2177	839	784	257.15	2.43	0
chrXIII	349290	350606	1317	610	402	76.07	2.07	0.16
chrXIII	351798	353973	2176	1257	969	718.99	3.19	0
chrXIII	356625	363442	6818	5758	3019	784.92	2.71	0
chrXIII	372209	379900	7692	5382	4088	1289.25	2.84	0
chrXIII	387111	389075	1965	1053	820	485.85	3.06	0
chrXIII	412569	414271	1703	986	552	173.71	2.07	0
chrXIII	429312	432376	3065	2153	1073	346.96	2.41	0
chrXIII	432910	435125	2216	993	975	723.26	3.42	0
chrXIII	472119	473904	1786	1010	723	386.28	2.91	0
chrXIII	475209	478683	3475	2741	1579	1250.91	3.25	0
chrXIII	504508	505568	1061	490	330	78.91	2.81	0.16
chrXIII	509876	511655	1780	900	748	437.03	3.23	0
chrXIII	539423	541488	2066	593	807	342.75	2.57	0
chrXIII	551017	552185	1169	698	350	50.34	2.18	0.13
chrXIII	555793	557740	1948	1069	693	257.05	2.79	0
chrXIII	560136	561351	1216	569	368	66.04	2.23	0.14
chrXIII	571628	573243	1616	612	465	62.87	2.09	0.14
chrXIII	598786	601768	2983	2402	1025	263.18	2.2	0
chrXIII	608024	610695	2672	2175	858	113.92	2.14	0
chrXIII	622044	624894	2851	630	883	239.81	2.16	0
chrXIII	625735	628462	2728	2183	843	147.02	2.27	0
chrXIII	651691	655330	3640	1651	1585	1081.95	3.01	0
chrXIII	655576	656885	1310	562	418	61.63	2.04	0.14
chrXIII	661245	662777	1533	794	565	207.71	2.76	0
chrXIII	674591	677003	2413	909	830	270.7	2.86	0
chrXIII	742222	744264	2043	1498	673	179.4	3.18	0
chrXIII	758433	759959	1527	929	554	207.81	2.65	0
chrXIII	768072	769222	1151	682	347	53.28	2.42	0.13
chrXIII	769963	772628	2666	583	805	133.3	1.99	0
chrXIII	773172	776007	2836	1701	1226	873.17	3.16	0
chrXIII	792776	794244	1469	760	535	146.58	2.71	0
chrXIII	797500	798844	1345	821	423	73.22	2.35	0.15
chrXIII	841252	842603	1352	737	485	194.27	3.2	0
chrXIII	851482	852952	1471	898	487	148.09	2.29	0
chrXIII	860901	862471	1571	681	521	120.97	2.21	0
chrXIII	900894	903301	2408	846	849	248.67	2.3	0
chrXIII	903312	905309	1998	1126	785	344.07	3.06	0
chrXIII	914819	916207	1389	658	472	178.96	2.82	0
chrXIV	1	7113	7113	3737	4408	2210.42	3.08	0
chrXIV	18719	19879	1161	615	381	105.72	3.17	0
chrXIV	22193	24035	1843	1151	697	357.23	2.61	0
chrXIV	33574	35350	1777	1148	776	631.96	4.46	0
chrXIV	57145	58720	1576	578	604	266.19	2.86	0
chrXIV	88609	90701	2093	1559	717	166.17	2.39	0
chrXIV	95764	97862	2099	1101	678	118.21	2.19	0
chrXIV	98120	101118	2999	1746	1205	66.43	1.98	0.14
chrXIV	101404	102827	1424	783	522	204.19	3.07	0
chrXIV	137532	138851	1320	371	393	64.24	1.98	0.14
chrXIV	196183	199340	3158	2621	1049	345.94	2.46	0
chrXIV	217017	218316	1300	401	377	70.03	1.98	0.15
chrXIV	228552	229613	1062	571	310	54.45	2.56	0.13
chrXIV	239470	240650	1181	605	359	63.21	2.37	0.14
chrXIV	253634	254876	1243	457	375	50.95	2.11	0.13
chrXIV	269412	270718	1307	732	439	124.07	2.8	0
chrXIV	273011	274793	1783	950	637	221.9	2.64	0
chrXIV	275253	276656	1404	674	478	123.11	2.43	0
chrXIV	281156	282477	1322	729	397	65.55	1.99	0.14
chrXIV	300551	302906	2356	1613	931	466.49	3.12	0
chrXIV	308504	310754	2251	570	667	81.48	1.84	0.16
chrXIV	321071	322197	1127	529	344	56.9	2.6	0.13
chrXIV	334597	336830	2234	1186	807	281.57	2.73	0
chrXIV	338766	340758	1993	623	723	242.19	3	0
chrXIV	349470	351196	1727	768	595	147.42	2.14	0
chrXIV	354602	357284	2683	766	1048	559.69	3.26	0
chrXIV	365471	367317	1847	1277	660	267.49	2.99	0
chrXIV	369623	370773	1151	564	341	53.36	2.34	0.13
chrXIV	371812	374402	2591	2109	850	211.11	2.2	0
chrXIV	407427	408567	1141	606	336	52.21	2.04	0.13
chrXIV	426533	427994	1462	679	489	146.56	2.5	0
chrXIV	439081	443580	4500	1742	1561	579.01	2.67	0
chrXIV	470639	471880	1242	755	402	105.05	2.59	0
chrXIV	477770	479755	1986	582	626	91.28	2.3	0
chrXIV	490740	492164	1425	669	503	114.19	2.4	0
chrXIV	517567	526324	8758	1990	3978	614.92	2.97	0
chrXIV	531012	533002	1991	661	674	113.18	2.08	0
chrXIV	541402	543640	2239	1332	705	106.37	1.77	0
chrXIV	546405	548398	1994	1210	861	457.76	2.79	0
chrXIV	558469	561195	2727	2133	996	212.79	2.13	0
chrXIV	561621	568680	7060	5503	3144	617.89	2.26	0
chrXIV	574989	577562	2574	1299	998	332.55	2.68	0
chrXIV	578421	579922	1502	607	527	132.15	2.58	0
chrXIV	585090	587304	2215	1225	713	151.29	2	0
chrXIV	604520	605727	1208	712	386	75.65	2.38	0.16
chrXIV	628847	634589	5743	2531	2121	732.85	2.91	0
chrXIV	651669	653435	1767	1181	568	100.51	1.91	0
chrXIV	661519	662997	1479	633	523	165.38	2.67	0
chrXIV	663145	664538	1394	717	445	95.43	2.17	0
chrXIV	685166	686514	1349	701	528	295.16	3.61	0
chrXIV	691437	693283	1847	661	745	465.74	3.64	0
chrXIV	693627	695953	2327	1754	803	231.63	2.61	0
chrXIV	707102	709164	2063	1411	748	358.67	4.61	0
chrXIV	725833	727300	1468	1003	485	115.9	2.52	0
chrXV	27079	29478	2400	1847	833	85.62	1.93	0
chrXV	44363	45528	1166	592	402	159.28	3.75	0
chrXV	69554	70858	1305	736	399	76.36	2.26	0.16
chrXV	77003	78106	1104	607	338	60.15	2.54	0.14
chrXV	82310	83953	1644	959	619	269.8	3.59	0
chrXV	103366	104602	1237	623	380	50.51	2.18	0.13
chrXV	108460	112479	4020	833	1572	599.87	2.57	0
chrXV	117397	124013	6617	1259	3755	1853.56	3.06	0
chrXV	158414	162635	4222	1639	2444	1905.87	3.23	0
chrXV	167370	169328	1959	1355	720	244.95	2.56	0
chrXV	169613	171477	1865	762	757	381.5	2.88	0
chrXV	211480	212804	1325	697	460	101.64	2.88	0
chrXV	215679	218835	3157	1063	1245	541.41	3.18	0
chrXV	230789	232817	2029	1297	804	409.79	3	0
chrXV	233337	235228	1892	452	603	83.77	1.78	0.17
chrXV	240664	241859	1196	673	356	50.66	2.17	0.13
chrXV	273319	275273	1955	1433	667	112.45	2.04	0
chrXV	287764	289065	1302	586	464	140.09	2.74	0
chrXV	295145	296969	1825	1172	607	161.04	2.44	0
chrXV	302645	305486	2842	1325	1114	519.25	2.65	0
chrXV	315541	317173	1633	618	554	150.34	2.08	0
chrXV	363482	364717	1236	624	366	59.52	2.01	0.13
chrXV	370403	372110	1708	1120	568	166.36	2.34	0
chrXV	382792	386028	3237	2437	1195	563.26	2.8	0
chrXV	391012	392647	1636	941	546	161.55	2.37	0
chrXV	399631	400824	1194	657	361	56.74	2.23	0.13
chrXV	407306	408889	1584	841	506	109.83	2.04	0
chrXV	417512	418885	1374	606	462	134.25	2.45	0
chrXV	423688	424907	1220	593	394	82.36	2.47	0.17
chrXV	425976	428160	2185	1587	830	319.73	2.62	0
chrXV	443028	444818	1791	924	694	316.93	2.63	0
chrXV	446323	448046	1724	533	547	103.31	2.36	0
chrXV	461300	463310	2011	1482	673	141.84	2.37	0
chrXV	478855	480791	1937	631	626	134.44	1.95	0
chrXV	481329	482619	1291	649	470	151.33	3.19	0
chrXV	486361	488056	1696	667	590	160.36	2.41	0
chrXV	493931	495363	1433	736	506	190.25	2.69	0
chrXV	511069	512216	1148	561	363	82.26	2.77	0.17
chrXV	519982	521416	1435	694	447	107.38	2.23	0
chrXV	533502	534642	1141	601	357	85.03	2.91	0.17
chrXV	579267	580561	1295	566	418	99.72	2.47	0
chrXV	594530	601054	6525	992	3321	990.84	3.18	0
chrXV	616321	617539	1219	591	421	150.34	3.28	0
chrXV	618034	619925	1892	502	618	161.39	2.41	0
chrXV	631159	632588	1430	633	507	193.78	2.93	0
chrXV	638230	639705	1476	782	507	180.73	2.49	0
chrXV	642182	643336	1155	587	365	74.73	2.7	0.15
chrXV	661342	662754	1413	904	445	96.41	2.05	0
chrXV	670062	671620	1559	932	556	259.65	3.1	0
chrXV	681783	684295	2513	618	935	434.31	2.92	0
chrXV	703826	710447	6622	5690	2850	498.16	2.37	0
chrXV	711887	713189	1303	656	619	505.12	5.06	0
chrXV	716540	717685	1146	587	348	67.46	2.45	0.14
chrXV	733247	734360	1114	532	339	76.91	2.61	0.16
chrXV	741027	743134	2108	626	890	670.64	4.51	0
chrXV	754637	755863	1227	565	375	69.25	2.29	0.15
chrXV	760687	763039	2353	589	866	364.07	3.13	0
chrXV	768926	770974	2049	1475	798	420.71	3.23	0
chrXV	779154	782001	2848	1321	1064	421.94	3.09	0
chrXV	816470	817579	1110	558	333	69.05	2.89	0.15
chrXV	824942	826413	1472	747	522	222.94	2.88	0
chrXV	831748	833035	1288	702	401	59.94	2.24	0.14
chrXV	836117	837994	1878	842	827	555.93	3.05	0
chrXV	849007	850751	1745	534	537	83.35	1.81	0.17
chrXV	859796	861660	1865	571	586	97.81	2.25	0
chrXV	866122	867403	1282	742	426	112.14	2.49	0
chrXV	876798	878814	2017	773	679	115.26	1.88	0
chrXV	908115	913128	5014	3842	1784	547.5	2.54	0
chrXV	920711	921858	1148	564	375	84.36	3.03	0.17
chrXV	930664	932374	1711	575	516	81.95	2.26	0.16
chrXV	942807	944247	1441	606	558	291.16	3.27	0
chrXV	967439	969457	2019	830	787	278.1	2.63	0
chrXV	969812	976745	6934	6226	2943	255.99	2.08	0
chrXV	977796	980070	2275	881	910	391.88	2.6	0
chrXV	986209	990246	4038	1530	2032	1535.97	3.01	0
chrXV	1009200	1010696	1497	575	448	55	1.85	0.13
chrXV	1038566	1041946	3381	2082	1410	621.1	2.48	0
chrXV	1042754	1045189	2436	664	872	248.98	2.73	0
chrXVI	1	7045	7045	3577	4387	2360.11	3.25	0
chrXVI	13691	14874	1184	610	375	56.04	2.54	0.13
chrXVI	29428	31037	1610	1076	534	164.05	2.89	0
chrXVI	40119	41439	1321	543	445	114.77	2.42	0
chrXVI	55566	63066	7501	1711	4100	1245.34	2.97	0
chrXVI	74049	75881	1833	868	619	124.95	2.16	0
chrXVI	95875	98683	2809	672	1065	324.63	2.3	0
chrXVI	104975	107098	2124	458	580	81.09	2.3	0.16
chrXVI	113568	115847	2280	1372	871	397.5	2.93	0
chrXVI	127733	128997	1265	660	393	63.98	2.19	0.14
chrXVI	132034	133298	1265	731	377	55.65	2.01	0.13
chrXVI	213800	215610	1811	666	626	203.94	2.3	0
chrXVI	279613	280775	1163	501	357	57.2	2.56	0.13
chrXVI	296114	298316	2203	714	780	250.45	2.69	0
chrXVI	326018	327139	1122	622	336	63.63	2.65	0.14
chrXVI	338459	340077	1619	913	496	97.39	2.17	0
chrXVI	354847	355971	1125	610	335	53.79	2.51	0.13
chrXVI	380885	382170	1286	685	410	79.85	2.45	0.16
chrXVI	410882	412767	1886	694	641	151.08	1.99	0
chrXVI	424945	426577	1633	762	618	255.8	2.71	0
chrXVI	431166	434343	3178	1091	1099	337.69	2.29	0
chrXVI	450431	452133	1703	440	533	103.82	1.97	0
chrXVI	452849	455871	3023	2080	1230	737.43	3.01	0
chrXVI	463244	464905	1662	828	723	469.4	3.94	0
chrXVI	481469	482767	1299	521	386	60.23	1.92	0.14
chrXVI	491195	493670	2476	1952	779	190.03	2.4	0
chrXVI	501909	503794	1886	1107	633	167.26	2.38	0
chrXVI	525372	527792	2421	1521	948	429.8	3.13	0
chrXVI	549854	552544	2691	2092	1098	449.27	2.48	0
chrXVI	566414	568515	2102	511	638	78.91	2.13	0.16
chrXVI	571878	573147	1270	577	449	131.01	2.74	0
chrXVI	574733	576387	1655	1115	557	140.83	2.22	0
chrXVI	581278	583737	2460	1718	733	90.82	2.33	0
chrXVI	585457	588972	3516	1710	1355	702.42	3.13	0
chrXVI	609583	610812	1230	630	410	89.7	2.66	0
chrXVI	622046	623820	1775	1199	614	196.75	2.23	0
chrXVI	641105	642366	1262	645	412	96.14	2.53	0
chrXVI	644368	647810	3443	2560	1578	1133.91	2.83	0
chrXVI	653108	654404	1297	647	515	270.45	3.85	0
chrXVI	664416	666487	2072	1539	657	132.46	2.05	0
chrXVI	676451	677718	1268	778	387	57.93	1.97	0.13
chrXVI	677911	680813	2903	713	1092	383.99	2.39	0
chrXVI	681168	682697	1530	961	483	65.87	2.03	0.14
chrXVI	694595	696097	1503	546	462	71.4	2.05	0.15
chrXVI	699697	702264	2568	1946	886	134.47	2.24	0
chrXVI	712515	713813	1299	528	428	105.98	2.37	0
chrXVI	717998	719673	1676	554	464	72.65	2.17	0.15
chrXVI	728688	730310	1623	561	537	167.94	2.25	0
chrXVI	789049	790386	1338	711	448	117.71	2.47	0
chrXVI	796806	798030	1225	653	376	66	2.26	0.14
chrXVI	804403	810967	6565	5477	3685	1513.12	3.23	0
chrXVI	821451	823086	1636	626	601	232.62	2.51	0
chrXVI	827655	832631	4977	1358	2280	1773.19	3.32	0
chrXVI	833272	835031	1760	1106	520	60.64	1.94	0.14
chrXVI	859929	864677	4749	876	2366	1931.97	3.52	0
chrXVI	874334	875546	1213	632	380	72.09	2.31	0.15
chrXVI	876163	877375	1213	676	382	89.8	2.71	0
chrXVI	882437	884236	1800	829	681	344.13	3.28	0
chrXVI	899214	900936	1723	987	557	129.99	2.3	0
chrXVI	926993	928856	1864	1099	856	823.58	4.08	0
