# Supplementary material for: Rvb1/Rvb2 proteins couple transcription and translation during glucose starvation
Source: eLife journal article supplement (doi:10.7554/elife.76965), 2022-09-14
Supplement: supp [file source_data_Fig4B.xlsx]

## Sheet: in
Nluc Assay	Strain	Reporter	Feature	Condition	rep1	rep2	rep3	rep4	rep5	rep1	rep2	rep3	rep4	rep5	Average	SEM	One-sample t-test
1	ZY266	HSP30prutr-nLucPest	PP7 ctrl	glucose starvation	18098.6	18026.1	3477.47	1897.4	2106.29	0	0	0	0	0	0
2	ZY266	HSP30prutr-nLucPest	PP7 ctrl	log phase	250.98	212.879	60.9877	75.6837	53.9773
3	ZY314	HSP30prutr-nLucPest	PP7+Rvb1-PCP	glucose starvation	11430.2	11175.7				-0.663034	-0.689721				-0.676377	0.0133436	0.0127
4	ZY314	HSP30prutr-nLucPest	PP7+Rvb1-PCP	log phase	259.016	289.583
5	ZY315	HSP30prutr-nLucPest	PP7+Rvb2-PCP	glucose starvation	10353.6	7640.3	2309.3	1375.68	1675.83	-0.80575	-1.23838	-0.590583	-0.463884	-0.329825	-0.685685	0.158866	0.012485
6	ZY315	HSP30prutr-nLucPest	PP7+Rvb2-PCP	log phase	131.915	126.531	42.161	55.6156	43.6128
7	ZY269	HSP30prutr-nLucPest	PP7+GFP-PCP	glucose starvation			3039.31	1230.92	2173.69			-0.194296	-0.624287	0.0454407	-0.257714	0.160728	0.3189
8	ZY269	HSP30prutr-nLucPest	PP7+GFP-PCP	log phase			33.6715	36.1	49.2098
RT-QPCR	Strain	Reporter	Feature	Condition	rep1	rep2	rep3	rep4	rep5	rep1	rep2	rep3	rep4	rep5	Average	SEM	One-sample t-test
	ZY266	HSP30prutr-nLucPest	PP7 ctrl	glucose starvation	0.0581128	0.0681567	0.179274	0.181281	0.281573	0	0	0	0	0	0
	ZY266	HSP30prutr-nLucPest	PP7 ctrl	log phase	0.0021822	0.00233883	0.00491755	0.00490368	0.00570813
	ZY314	HSP30prutr-nLucPest	PP7+Rvb1-PCP	glucose starvation	0.106949	0.103306				0.88	0.6				0.74	0.14	0.119
	ZY314	HSP30prutr-nLucPest	PP7+Rvb1-PCP	log phase	0.00191293	0.00187356
	ZY315	HSP30prutr-nLucPest	PP7+Rvb2-PCP	glucose starvation	0.134904	0.12896	0.320635	0.478543	0.402218	1.215	0.92	0.838764	1.40042	0.514467	0.977731	0.153659	0.003127
	ZY315	HSP30prutr-nLucPest	PP7+Rvb2-PCP	log phase	0.00197354	0.00200804	0.00415634	0.00377656	0.00470053
	ZY269	HSP30prutr-nLucPest	PP7+GFP-PCP	glucose starvation			0.170826	0.161987	0.24286			-0.0696427	-0.162349	-0.213386	-0.148459	0.0420723	0.07177
	ZY269	HSP30prutr-nLucPest	PP7+GFP-PCP	log phase			0.00575116	0.00476945	0.00643361
									Translatability	rep1	rep2	rep3	rep4	rep5	Average	SEM	One-sample t-test
										-1.54303	-1.28972				-1.41638	0.126656	0.05677
										-2.02075	-2.15838	-1.42935	-1.86431	-0.844293	-1.66342	0.23862	0.0022265
												-0.124654	-0.461937	0.258827	-0.109255	0.208209	0.65213
