# Supplementary material for: Rvb1/Rvb2 proteins couple transcription and translation during glucose starvation
Source: eLife journal article supplement (doi:10.7554/elife.76965), 2022-09-14
Supplement: supp [file source_data_Fig4E.xlsx]

## Sheet: source_data_Fig5B
PP7 ctrl
time after -G	Replicate 1	Replicate 2	Replicate 3	Replicate 4	Average	SEM	ttest
0	1	1	1	1	1
5	3.28297	2.8481	5.65685	5.42642	4.30358	0.721814	0.018552
10	18.0634	13.4078	12.1257	12.7728	14.0924	1.34929	0.000593645
20	66.9494	55.3304	47.0134	41.0696	52.5907	5.60893	0.0063178
30	111.43	84.7417	81.8551	69.3104	86.8344	8.8564	0.0119886
45	230.72	176.069	147.544	107.635	165.492	25.8782	0.020538
PP7+Rvb2-PCP
time after -G	Replicate 1	Replicate 2	Replicate 3	Replicate 4	Average	SEM	ttest
0	1	1	1	1	1
5	5.6962	5.9794	8.11168	7.1602	6.73687	0.55723
10	36.0019	28.1488	28.3446	25.2813	29.4441	2.29528
20	129.787	106.521	84.1563	76.3735	99.2095	12.0295
30	243.032	185.465	130.237	129.787	172.13	27.0074
45	441.112	338.967	230.72	234.753	311.388	49.9742
